# Supplementary material for: Study of the preanalytical variables affecting the measurement of clinically relevant free-circulating microRNAs: focus on sample matrix, platelet depletion, and storage conditions
Source: PubMed Central journal article supplement (PMC6904965; doi:10.11613/bm.2020.010703), 2019-12-15
Supplement: bm-30-1-010703-S1.pdf [file bm-30-1-010703-S1.pdf]

**Supplementary Table 1.** Complete between-group comparison of circulating miRNA expression

| miRNAs,         | Storage condition            |                 |                 |            |                         |                 |                         |            |                         |                 |                 |            |
|-----------------|------------------------------|-----------------|-----------------|------------|-------------------------|-----------------|-------------------------|------------|-------------------------|-----------------|-----------------|------------|
|                 | Immediately frozen at - 80°C |                 |                 |            | 24h RT                  |                 |                         |            | 24h 4°C                 |                 |                 |            |
|                 | fold change (P)              | PPT vs K2EDTA   | K2EDTA vs PPP   | PPT vs PPP | P                       | PPP vs K2EDTA   | PPT vs K2EDTA           | PPT vs PPP | P                       | PPP vs K2EDTA   | PPT vs K2EDTA   | PPT vs PPP |
| hsa-let-7a-5p   | 1.90<br>(0.408)              | 1.72<br>(0.890) | 3.26<br>(0.034) | 0.039      | 0.24                    | 1.10            | 0.22                    | 0.061      | 0.43                    | 0.93            | 1.92            | 0.067      |
| hsa-let-7b-3p   | 35.73                        | 1.00            | 35.73           | 0.063      | 0.77                    | 13.21           | 0.06                    | 0.058      | 0.85                    | 1.10            | 14.55           | 0.782      |
| hsa-let-7b-5p   | 2.29<br>(0.303)              | 0.33<br>(0.051) | 0.76<br>(0.990) | 0.051      | 0.50<br>(0.034)         | 0.81<br>(0.890) | 0.62<br>(0.408)         | 0.039      | 1.35                    | 1.14            | 2.18            | 0.148      |
| hsa-let-7c-5p   | 1.48                         | 1.10            | 1.62            | 0.733      | 0.01<br>(0.051)         | 0.68<br>(0.990) | 0.01<br>(0.303)         | 0.051      | 0.02                    | 0.77            | 1.71            | 0.061      |
| hsa-let-7d-3p   | 0.61<br>(0.303)              | 2.62<br>(0.051) | 1.59<br>(0.990) | 0.051      | 0.77                    | 1.59            | 0.48                    | 0.079      | 1.04                    | 1.35            | 2.16            | 0.561      |
| hsa-let-7d-5p   | 2.87<br>(0.051)              | 0.78<br>(0.990) | 2.24<br>(0.303) | 0.051      | 0.01                    | 1.00            | 0.01                    | 0.067      | 0.65                    | 1.38            | 64.99           | 0.301      |
| hsa-let-7e-5p   | 59.26                        | 0.01            | 0.80            | 0.067      | 0.01                    | 1.33            | 0.01                    | 0.067      | 0.97                    | 0.59            | 89.87           | 0.288      |
| hsa-let-7f-5p   | 1.25                         | 2.04            | 2.56            | 0.067      | 0.35                    | 0.99            | 0.35                    | 0.067      | 0.53                    | 1.17            | 1.51            | 0.301      |
| hsa-let-7g-5p   | 1.08                         | 1.03            | 1.12            | 0.875      | 0.72                    | 0.72            | 1.01                    | 0.393      | 0.52                    | 0.42            | 0.51            | 0.079      |
| hsa-let-7i-5p   | 1.12                         | 0.83            | 0.93            | 0.733      | 0.78                    | 0.71            | 1.11                    | 0.393      | 1.71                    | 0.87            | 1.54            | 0.393      |
| hsa-miR-1       | 12.84                        | 0.02            | 0.29            | 0.092      | <b>0.02<br/>(0.027)</b> | 0.12<br>(0.470) | 0.16<br>(0.699)         | 0.032      | <b>0.02<br/>(0.027)</b> | 0.20<br>(0.470) | 0.11<br>(0.699) | 0.032      |
| hsa-miR-101-3p  | 0.25                         | 3.32            | 0.82            | 0.061      | 1.79                    | 0.72            | 2.49                    | 0.252      | 0.87                    | 0.48            | 0.35            | 0.288      |
| hsa-miR-103a-3p | 0.81<br>(0.991)              | 3.80<br>(0.051) | 3.07<br>(0.303) | 0.051      | 1.02                    | 2.22            | 0.46                    | 0.061      | 0.65                    | 1.22            | 1.40            | 0.491      |
| hsa-miR-106a-5p | 1.36                         | 1.78            | 2.41            | 0.051      | 0.60<br>(0.539)         | 3.62<br>(0.539) | <b>0.17<br/>(0.022)</b> | 0.027      | 0.73                    | 0.58            | 4.41            | 0.079      |
| hsa-miR-106b-3p | 36.28                        | 0.74            | 27.02           | 0.058      | 0.74                    | 39.55           | 0.02                    | 0.058      | 0.02                    | 0.02            | 0.91            | 0.058      |
| hsa-miR-106b-5p | 0.56                         | 0.80            | 0.44            | 0.393      | 0.01<br>(0.051)         | 0.53<br>(0.990) | 0.01<br>(0.303)         | 0.051      | 1.25                    | 0.61            | 103.59          | 0.393      |
| hsa-miR-107     | 0.66                         | 2.00            | 1.32            | 0.561      | 0.64                    | 0.60            | 1.08                    | 0.875      | 0.65                    | 1.25            | 0.61            | 0.561      |

|                 |                  |                          |                        |       |                          |                  |                        |       |                          |                         |                        |       |
|-----------------|------------------|--------------------------|------------------------|-------|--------------------------|------------------|------------------------|-------|--------------------------|-------------------------|------------------------|-------|
| hsa-miR-10b-5p  | 4.36             | 1.00                     | 4.36                   | 1.000 | <b>323.51</b><br>(0.022) | 23.92<br>(0.539) | 13.52<br>(0.539)       | 0.027 | <b>203.30</b><br>(0.022) | 35.11<br>(0.539)        | 15.03<br>(0.539)       | 0.027 |
| hsa-miR-122-5p  | 0.80             | 0.37                     | 0.30                   | 0.061 | 3.31<br>(0.539)          | 0.34<br>(0.539)  | <b>9.71</b><br>(0.022) | 0.027 | 2.22<br>(0.539)          | 0.33<br>(0.539)         | 0.023<br>(0.022)       | 0.027 |
| hsa-miR-125a-5p | 0.77<br>(0.990)  | 96.22<br>(0.051)         | 74.14<br>(0.303)       | 0.051 | 1.03                     | 1.03             | 1.00                   | 0.957 | 1.29                     | 2.12                    | 1.29                   | 0.061 |
| hsa-miR-125b-5p | 0.22<br>(0.539)  | <b>169.01</b><br>(0.022) | 36.73<br>(0.539)       | 0.027 | 1.00                     | 21.01            | 0.05                   | 0.063 | 0.02                     | 0.03                    | 0.52                   | 0.064 |
| hsa-miR-1260a   | 43.13            | 0.94                     | 40.37                  | 0.058 | <b>0.01</b><br>(0.022)   | 0.42<br>(0.539)  | 0.03<br>(0.539)        | 0.027 | <b>0.01</b><br>(0.022)   | 0.79<br>(0.539)         | 0.58<br>(0.539)        | 0.027 |
| hsa-miR-126-3p  | 1.59<br>(0.539)  | 2.78<br>(0.539)          | <b>4.42</b><br>(0.022) | 0.027 | 0.64<br>(0.539)          | 1.83<br>(0.539)  | <b>0.35</b><br>(0.022) | 0.027 | 0.53<br>(0.539)          | 1.63<br>(0.539)         | <b>1.53</b><br>(0.022) | 0.027 |
| hsa-miR-126-5p  | 1.53             | 0.75                     | 1.15                   | 0.561 | 0.75                     | 1.90             | 0.39                   | 0.061 | 0.52<br>(0.408)          | 2.82<br>(0.899)         | 1.32<br>(0.038)        | 0.039 |
| hsa-miR-127-3p  | 34.15            | 1.00                     | 34.15                  | 0.063 | 0.02                     | 1.68             | 0.01                   | 0.077 | 0.02                     | 0.98                    | 1.69                   | 0.067 |
| hsa-miR-128-3p  | 1.00             | 1.12                     | 1.12                   | 0.869 | 1.01                     | 53.70            | 0.02                   | 0.064 | <b>0.02</b><br>(0.028)   | 0.71<br>(0.539)         | 1.17<br>(0.539)        | 0.027 |
| hsa-miR-130a-3p | 34.02            | 1.60                     | 54.28                  | 0.058 | 0.02                     | 1.18             | 0.02                   | 0.067 | 0.02                     | 1.26                    | 1.06                   | 0.067 |
| hsa-miR-130b-3p | 1.32             | 0.76                     | 1.00                   | 0.723 | 1.66                     | 2.19             | 0.76                   | 0.243 | 0.07                     | 0.09                    | 0.09                   | 0.097 |
| hsa-miR-132-3p  | 32.00            | 0.92                     | 29.50                  | 0.058 | 0.01<br>(0.051)          | 0.40<br>(0.990)  | 0.02<br>(0.303)        | 0.051 | 0.02<br>(0.303)          | 1.61<br>(0.990)         | 1.15<br>(0.051)        | 0.051 |
| hsa-miR-133b    | 1.75             | 0.77                     | 1.35                   | 0.243 | 1.30                     | 1.75             | 0.74                   | 0.243 | 0.74                     | 26.98                   | 1.00                   | 0.058 |
| hsa-miR-139-5p  | 1.13             | 66.55                    | 75.01                  | 0.610 | 0.02                     | 1.08             | 0.01                   | 0.067 | 0.02<br>(0.051)          | 0.75<br>(0.990)         | 1.30<br>(0.051)        | 0.051 |
| hsa-miR-140-3p  | 0.66             | 0.83                     | 0.55                   | 0.670 | 1.62<br>(0.539)          | 0.50<br>(0.539)  | 3.24<br>(0.022)        | 0.027 | 1.10                     | 0.38                    | 0.34                   | 0.067 |
| hsa-miR-140-5p  | 41.24            | 1.00                     | 41.24                  | 0.063 | 1.00                     | 32.90            | 0.03                   | 0.063 | 1.10<br>(0.699)          | <b>41.32</b><br>(0.027) | 36.22<br>(0.470)       | 0.032 |
| hsa-miR-142-3p  | 1.02             | 5.39                     | 5.49                   | 0.067 | 0.71                     | 2.32             | 0.31                   | 0.099 | 0.15<br>(0.539)          | 2.55<br>(0.539)         | 0.48<br>(0.022)        | 0.027 |
| hsa-miR-142-5p  | 0.92             | 179.70                   | 165.69                 | 0.061 | 0.01                     | 1.61             | 0.01                   | 0.061 | 0.03                     | 3.25                    | 4.67                   | 0.067 |
| hsa-miR-143-3p  | 34.31<br>(0.539) | <b>0.01</b><br>(0.022)   | 0.22<br>(0.539)        | 0.027 | 1.38                     | 28.73            | 0.05                   | 0.055 | 0.01                     | 0.98                    | 0.25                   | 0.067 |

|                 |                               |                                 |                  |       |                               |                 |                 |       |                 |                 |                                |       |
|-----------------|-------------------------------|---------------------------------|------------------|-------|-------------------------------|-----------------|-----------------|-------|-----------------|-----------------|--------------------------------|-------|
| hsa-miR-144-3p  | <b>0.17</b><br><b>(0.034)</b> | 1.74<br>(0.890)                 | 0.29<br>(0.408)  | 0.039 | 6.30                          | 0.51            | 12.43           | 0.148 | 2.31            | 1.63            | 0.19                           | 0.491 |
| hsa-miR-144-5p  | 53.84                         | 1.04                            | 56.03            | 0.064 | <b>0.01</b><br><b>(0.034)</b> | 0.45<br>(0.890) | 0.02<br>(0.408) | 0.039 | 1.62<br>(0.539) | 0.27<br>(0.539) | <b>76.36</b><br><b>(0.022)</b> | 0.027 |
| hsa-miR-145-5p  | 0.79                          | 1.69                            | 1.33             | 0.113 | 1.09                          | 1.00            | 1.09            | 0.733 | 1.27            | 1.21            | 1.16                           | 0.670 |
| hsa-miR-146a-5p | 1.21                          | 2.81                            | 3.40             | 0.061 | 0.75<br>(0.990)               | 2.52<br>(0.303) | 0.30<br>(0.022) | 0.027 | 0.66            | 1.82            | 2.19                           | 0.148 |
| hsa-miR-146b-5p | 32.94<br>(0.539)              | <b>0.01</b><br><b>(0.022)</b>   | 0.26<br>(0.539)  | 0.027 | <b>0.01</b><br><b>(0.022)</b> | 0.49<br>(0.539) | 0.02<br>(0.539) | 0.027 | 0.01            | 0.83            | 0.63                           | 0.061 |
| hsa-miR-148a-3p | 108.34                        | 1.00                            | 108.34           | 0.063 | 0.01                          | 0.96            | 0.01            | 0.061 | 0.01            | 0.97            | 0.92                           | 0.061 |
| hsa-miR-148b-3p | 108.18                        | 0.01                            | 0.58             | 0.061 | 298.06                        | 166.42          | 1.79            | 0.061 | 0.01            | 0.88            | 0.00                           | 0.067 |
| hsa-miR-150-5p  | 0.59<br>(0.539)               | 0.56<br>(0.539)                 | 0.33<br>(0.022)  | 0.027 | 1.99                          | 0.40            | 5.01            | 0.079 | 2.71            | 0.90            | 0.54                           | 0.067 |
| hsa-miR-151a-3p | 2.50                          | 1.09                            | 2.74             | 0.430 | 0.74                          | 1.76            | 0.42            | 0.202 | 0.02<br>(0.303) | 1.69<br>(0.990) | 0.04<br>(0.051)                | 0.051 |
| hsa-miR-151a-5p | 1.03                          | 2.35                            | 2.42             | 0.193 | 0.85                          | 2.24            | 0.38            | 0.061 | 0.62            | 2.34            | 1.65                           | 0.058 |
| hsa-miR-152-3p  | 0.47<br>(0.539)               | <b>106.31</b><br><b>(0.022)</b> | 50.45<br>(0.539) | 0.027 | 1.81                          | 1.03            | 1.75            | 0.067 | 0.02<br>(0.408) | 2.70<br>(0.890) | <b>0.01</b><br><b>(0.034)</b>  | 0.039 |
| hsa-miR-154-5p  | 43.89                         | 0.87                            | 38.31            | 0.058 | 0.80                          | 29.02           | 0.03            | 0.058 | 1.13            | 1.41            | 41.02                          | 0.634 |
| hsa-miR-155-5p  | 56.78<br>(0.408)              | <b>0.01</b><br><b>(0.034)</b>   | 0.41<br>(0.890)  | 0.039 | 0.01                          | 0.61            | 0.02            | 0.067 | 1.10            | 67.05           | 62.57                          | 0.064 |
| hsa-miR-15a-5p  | 1.97<br>(0.539)               | <b>0.20</b><br><b>(0.022)</b>   | 0.39<br>(0.539)  | 0.027 | 2.40                          | 0.81            | 2.95            | 0.061 | 1.21            | 0.43            | 0.41                           | 0.061 |
| hsa-miR-15b-3p  | 63.95                         | 1.00                            | 63.95            | 0.063 | <b>0.02</b><br><b>(0.034)</b> | 0.55<br>(0.890) | 0.03<br>(0.408) | 0.039 | 1.76<br>(0.539) | 0.54<br>(0.539) | <b>56.45</b><br><b>(0.022)</b> | 0.027 |
| hsa-miR-15b-5p  | 0.85                          | 1.08                            | 0.92             | 0.837 | 0.02                          | 1.50            | 0.01            | 0.059 | 0.01            | 1.56            | 1.16                           | 0.061 |
| hsa-miR-16-2-3p | 45.83<br>(0.539)              | <b>0.01</b><br><b>(0.022)</b>   | 0.26<br>(0.539)  | 0.027 | 0.01                          | 0.01            | 1.00            | 0.063 | 0.01            | 0.02            | 0.01                           | 0.058 |
| hsa-miR-16-5p   | 0.89<br>(0.539)               | 0.48<br>(0.539)                 | 0.43<br>(0.022)  | 0.027 | 2.86<br>(0.408)               | 0.83<br>(0.890) | 3.46<br>(0.034) | 0.039 | 3.31<br>(0.028) | 1.46<br>(0.539) | 0.96<br>(0.539)                | 0.027 |
| hsa-miR-17-5p   | 37.86                         | 0.98                            | 37.26            | 0.064 | 1.00                          | 32.00           | 0.03            | 0.063 | 0.02<br>(0.408) | 1.38<br>(0.890) | 0.52<br>(0.034)                | 0.039 |
| hsa-miR-181a-5p | 1.75                          | 1.57                            | 2.76             | 0.061 | 0.02                          | 1.47            | 0.01            | 0.067 | 0.03            | 0.95            | 2.36                           | 0.236 |
| hsa-miR-185-5p  | 0.38<br>(0.539)               | 0.83<br>(0.539)                 | 0.31<br>(0.022)  | 0.027 | 0.44                          | 0.72            | 0.61            | 0.051 | 2.31            | 2.00            | 3.76                           | 0.193 |

|                 |                  |                                |                               |       |                               |                 |                                |       |                               |                 |                                |       |
|-----------------|------------------|--------------------------------|-------------------------------|-------|-------------------------------|-----------------|--------------------------------|-------|-------------------------------|-----------------|--------------------------------|-------|
| hsa-miR-186-5p  | 1.21             | 0.83                           | 1.00                          | 0.965 | <b>0.01</b><br><b>(0.022)</b> | 0.35<br>(0.539) | 0.03<br>(0.539)                | 0.027 | 0.58                          | 1.21            | 21.01                          | 0.634 |
| hsa-miR-18a-5p  | 0.63             | 1.44                           | 0.91                          | 0.061 | 0.02                          | 0.74            | 0.02                           | 0.061 | 0.02                          | 0.94            | 0.78                           | 0.061 |
| hsa-miR-18b-5p  | 0.51<br>(0.990)  | 150.93<br>(0.051)              | 77.03<br>(0.303)              | 0.051 | 0.02                          | 0.95            | 0.02                           | 0.061 | 0.01                          | 0.94            | 0.72                           | 0.067 |
| hsa-miR-191-5p  | 1.94<br>(0.890)  | 3.57<br>(0.408)                | <b>6.94</b><br><b>(0.034)</b> | 0.039 | 0.16                          | 1.15            | 0.14                           | 0.051 | 0.34<br>(0.890)               | 1.67<br>(0.408) | 2.42<br>(0.034)                | 0.039 |
| hsa-miR-192-5p  | 0.50<br>(0.539)  | 0.44<br>(0.539)                | 0.22<br>(0.022)               | 0.027 | 3.98                          | 0.74            | 5.39                           | 0.051 | 1.80<br>(0.890)               | 0.39<br>(0.408) | 0.33<br>(0.038)                | 0.039 |
| hsa-miR-193a-5p | 32.75            | 0.98                           | 25.52                         | 0.058 | 0.79                          | 1.34            | 0.59                           | 0.243 | 0.78                          | 1.00            | 1.32                           | 0.723 |
| hsa-miR-194-5p  | 28.90<br>(0.539) | <b>0.01</b><br><b>(0.022)</b>  | 0.16<br>(0.539)               | 0.027 | 5.78<br>(0.539)               | 0.39<br>(0.539) | <b>14.87</b><br><b>(0.022)</b> | 0.027 | 2.63<br>(0.539)               | 0.53<br>(0.539) | <b>0.18</b><br><b>(0.022)</b>  | 0.027 |
| hsa-miR-195-5p  | 46.57            | 1.00                           | 46.57                         | 0.063 | <b>0.01</b><br><b>(0.022)</b> | 0.54<br>(0.539) | 0.03<br>(0.539)                | 0.027 | 0.01<br>(0.303)               | 2.48<br>(0.990) | 0.34<br>(0.051)                | 0.051 |
| hsa-miR-197-3p  | 0.93             | 1.13                           | 1.06                          | 0.875 | 2.11                          | 1.43            | 1.48                           | 0.491 | 1.42                          | 1.10            | 0.96                           | 0.561 |
| hsa-miR-199a-3p | 1.46             | 41.25                          | 60.27                         | 0.061 | 0.01                          | 1.65            | 0.01                           | 0.061 | 1.23                          | 0.85            | 153.60                         | 0.252 |
| hsa-miR-199a-5p | 0.46<br>(0.539)  | <b>60.84</b><br><b>(0.022)</b> | 28.07<br>(0.539)              | 0.027 | 0.87                          | 48.86           | 0.02                           | 0.064 | 0.87                          | 49.74           | 48.86                          | 0.064 |
| hsa-miR-19a-3p  | 0.18             | 5.25                           | 0.94                          | 0.061 | 1.23                          | 1.06            | 1.16                           | 0.733 | 1.15                          | 2.00            | 0.99                           | 0.099 |
| hsa-miR-19b-3p  | 0.27<br>(0.051)  | 2.62<br>(0.303)                | 0.71<br>(0.909)               | 0.051 | 2.14                          | 1.36            | 1.57                           | 0.099 | 0.51                          | 0.36            | 0.32                           | 0.061 |
| hsa-miR-200c-3p | 33.46            | 0.78                           | 26.21                         | 0.058 | 0.01<br>(0.051)               | 0.48<br>(0.990) | 0.02<br>(0.303)                | 0.051 | 0.03                          | 1.61            | 1.13                           | 0.141 |
| hsa-miR-205-5p  | 7.69             | 0.01                           | 0.08                          | 0.092 | 1.00                          | 6.38            | 0.16                           | 0.106 | 2.41                          | 0.15            | 15.36                          | 0.241 |
| hsa-miR-20a-5p  | 0.34<br>(0.539)  | 1.65<br>(0.539)                | 0.56<br>(0.022)               | 0.027 | 0.62<br>(0.408)               | 1.68<br>(0.890) | 0.37<br>(0.034)                | 0.039 | 1.16                          | 1.36            | 3.17                           | 0.252 |
| hsa-miR-210-3p  | 33.68<br>(0.539) | <b>0.005</b><br><b>(0.022)</b> | 0.16<br>(0.539)               | 0.027 | 1.00                          | 1.17            | 0.85                           | 0.723 | 0.02                          | 0.02            | 0.02                           | 0.058 |
| hsa-miR-2110    | 42.84            | 0.01                           | 0.52                          | 0.082 | <b>0.01</b><br><b>(0.034)</b> | 0.40<br>(0.890) | 0.03<br>(0.408)                | 0.039 | <b>0.01</b><br><b>(0.022)</b> | 0.48<br>(0.539) | 0.44<br>(0.539)                | 0.027 |
| hsa-miR-215-5p  | 0.36<br>(0.303)  | 0.87<br>(0.990)                | 0.31<br>(0.051)               | 0.051 | 1.16                          | 33.39           | 0.03                           | 0.064 | 3.25<br>(0.539)               | 0.66<br>(0.539) | <b>93.70</b><br><b>(0.022)</b> | 0.027 |
| hsa-miR-21-5p   | 1.61             | 1.08                           | 1.75                          | 0.067 | 1.20                          | 1.17            | 1.02                           | 0.202 | 0.20<br>(0.539)               | 1.64<br>(0.539) | <b>0.19</b><br><b>(0.022)</b>  | 0.027 |
| hsa-miR-221-3p  | 0.42             | 3.87                           | 1.62                          | 0.058 | 1.06                          | 2.33            | 0.46                           | 0.193 | 1.28                          | 1.42            | 2.81                           | 0.670 |

|                 |                  |                                 |                               |       |                                 |                  |                               |       |                 |                 |                 |       |
|-----------------|------------------|---------------------------------|-------------------------------|-------|---------------------------------|------------------|-------------------------------|-------|-----------------|-----------------|-----------------|-------|
| hsa-miR-222-3p  | 0.96             | 0.41                            | 0.40                          | 0.061 | 5.70                            | 0.95             | 6.02                          | 0.067 | 2.33            | 1.12            | 0.39            | 0.193 |
| hsa-miR-223-3p  | 1.53<br>(0.539)  | 1.61<br>(0.539)                 | 2.48<br>(0.022)               | 0.027 | 0.07<br>(0.539)                 | 1.55<br>(0.539)  | <b>0.04</b><br><b>(0.022)</b> | 0.027 | 0.15            | 0.95            | 3.42            | 0.067 |
| hsa-miR-223-5p  | 38.34            | 1.00                            | 38.34                         | 0.063 | 1.00                            | 42.19            | 0.02                          | 0.063 | 0.02            | 0.02            | 0.67            | 0.058 |
| hsa-miR-22-3p   | 0.59             | 0.71                            | 0.42                          | 0.202 | 3.47                            | 1.39             | 2.49                          | 0.193 | 2.38            | 1.36            | 0.96            | 0.193 |
| hsa-miR-23a-3p  | 1.71<br>(0.539)  | 1.66<br>(0.539)                 | 2.85<br>(0.022)               | 0.027 | 0.36                            | 1.84             | 0.19                          | 0.061 | 0.43<br>(0.539) | 1.37<br>(0.539) | 2.23<br>(0.022) | 0.027 |
| hsa-miR-23b-3p  | 2.22<br>(0.990)  | 1.54<br>(0.303)                 | 3.41<br>(0.051)               | 0.051 | 0.52<br>(0.303)                 | 1.27<br>(0.990)  | 0.41<br>(0.051)               | 0.051 | 0.20<br>(0.539) | 1.63<br>(0.539) | 0.50<br>(0.022) | 0.027 |
| hsa-miR-24-3p   | 1.54<br>(0.539)  | 3.51<br>(0.539)                 | <b>5.39</b><br><b>(0.022)</b> | 0.027 | 0.20<br>(0.303)                 | 1.12<br>(0.990)  | 0.18<br>(0.051)               | 0.051 | 0.66<br>(0.539) | 2.45<br>(0.539) | 3.67<br>(0.022) | 0.027 |
| hsa-miR-25-3p   | 0.76<br>(0.539)  | 0.64<br>(0.539)                 | 0.49<br>(0.022)               | 0.027 | 1.64<br>(0.539)                 | 0.53<br>(0.539)  | 3.08<br>(0.022)               | 0.027 | 1.78<br>(0.408) | 0.81<br>(0.890) | 0.58<br>(0.034) | 0.039 |
| hsa-miR-26a-5p  | 1.31             | 2.02                            | 2.65                          | 0.202 | 0.50<br>(0.408)                 | 1.58<br>(0.890)  | 0.32<br>(0.034)               | 0.039 | 0.43<br>(0.539) | 3.16<br>(0.539) | 1.37<br>(0.022) | 0.027 |
| hsa-miR-26b-5p  | 0.48             | 1.05                            | 0.51                          | 0.177 | 1.19                            | 0.85             | 1.39                          | 0.558 | 0.03            | 1.53            | 0.02            | 0.065 |
| hsa-miR-27a-3p  | 0.88             | 0.85                            | 0.74                          | 0.491 | 0.03                            | 1.20             | 0.02                          | 0.061 | 0.02            | 1.33            | 0.98            | 0.061 |
| hsa-miR-27b-3p  | 0.63<br>(0.408)  | 2.58<br>(0.034)                 | 1.63<br>(0.890)               | 0.039 | 0.63                            | 1.59             | 0.40                          | 0.058 | 0.59            | 1.40            | 1.48            | 0.079 |
| hsa-miR-28-3p   | 71.88            | 1.00                            | 71.88                         | 0.063 | 0.02<br>(0.303)                 | 1.46<br>(0.990)  | 0.02<br>(0.051)               | 0.051 | 0.02<br>(0.303) | 1.69<br>(0.990) | 1.31<br>(0.051) | 0.051 |
| hsa-miR-28-5p   | 1.04             | 55.95                           | 58.13                         | 0.061 | 0.01                            | 0.84             | 0.02                          | 0.067 | 0.02            | 1.09            | 1.42            | 0.067 |
| hsa-miR-29a-3p  | 0.47<br>(0.539)  | 0.76<br>(0.539)                 | 0.35<br>(0.022)               | 0.027 | 6.55                            | 0.93             | 7.04                          | 0.061 | 1.79            | 0.73            | 0.25            | 0.099 |
| hsa-miR-29b-3p  | 37.76            | 1.00                            | 37.76                         | 0.063 | 0.89                            | 0.79             | 1.13                          | 0.243 | 0.01            | 0.01            | 0.01            | 0.058 |
| hsa-miR-29c-3p  | 55.34<br>(0.539) | <b>0.004</b><br><b>(0.022)</b>  | 0.21<br>(0.539)               | 0.027 | 0.01                            | 0.01             | 1.00                          | 0.063 | 0.01            | 0.75            | 0.01            | 0.061 |
| hsa-miR-301a-3p | 0.36<br>(0.539)  | <b>170.97</b><br><b>(0.022)</b> | 61.12<br>(0.539)              | 0.027 | <b>0.01</b><br><b>(0.034)</b>   | 0.71<br>(0.890)  | 0.02<br>(0.408)               | 0.039 | 0.02<br>(0.539) | 2.54<br>(0.539) | 1.13<br>(0.022) | 0.027 |
| hsa-miR-30a-5p  | 34.37            | 1.07                            | 36.71                         | 0.058 | <b>358.44</b><br><b>(0.022)</b> | 40.39<br>(0.539) | 8.87<br>(0.539)               | 0.027 | 4.54            | 1.14            | 0.51            | 0.061 |
| hsa-miR-30b-5p  | 1.18             | 1.59                            | 1.88                          | 0.288 | 0.63                            | 1.24             | 0.51                          | 0.099 | 0.82            | 0.85            | 1.60            | 0.957 |
| hsa-miR-30c-5p  | 1.17             | 3.19                            | 3.75                          | 0.061 | 0.34<br>(0.034)                 | 0.81<br>(0.890)  | 0.41<br>(0.408)               | 0.039 | 0.71            | 1.17            | 1.73            | 0.393 |

|                 |                               |                                 |                                |       |                               |                 |                 |       |                 |                 |                 |       |
|-----------------|-------------------------------|---------------------------------|--------------------------------|-------|-------------------------------|-----------------|-----------------|-------|-----------------|-----------------|-----------------|-------|
| hsa-miR-30d-5p  | 1.53                          | 1.08                            | 1.65                           | 0.067 | 0.80<br>(0.890)               | 1.62<br>(0.408) | 0.49<br>(0.034) | 0.039 | 1.08            | 1.73            | 2.18            | 0.301 |
| hsa-miR-30e-3p  | 38.32<br>(0.539)              | <b>38.32</b><br><b>(0.022)</b>  | 0.33<br>(0.539)                | 0.027 | <b>0.01</b><br><b>(0.034)</b> | 0.46<br>(0.890) | 0.02<br>(0.408) | 0.039 | 0.02            | 1.75            | 0.72            | 0.061 |
| hsa-miR-30e-5p  | 0.77                          | 1.14                            | 0.87                           | 0.561 | 0.91                          | 1.07            | 0.85            | 0.837 | 1.04            | 0.90            | 1.22            | 0.957 |
| hsa-miR-320a    | 1.92<br>(0.022)               | 0.64<br>(0.539)                 | 1.23<br>(0.539)                | 0.027 | 1.79<br>(0.408)               | 0.91<br>(0.890) | 1.97<br>(0.034) | 0.039 | 3.20<br>(0.022) | 1.22<br>(0.539) | 1.63<br>(0.539) | 0.027 |
| hsa-miR-320b    | 1.96                          | 0.35                            | 0.68                           | 0.079 | 0.92                          | 0.76            | 1.21            | 0.561 | 3.59<br>(0.022) | 1.32<br>(0.539) | 2.97<br>(0.539) | 0.027 |
| hsa-miR-320c    | 1.09                          | 0.58                            | 0.63                           | 0.561 | 1.23                          | 0.72            | 1.72            | 0.113 | 1.59            | 1.10            | 0.92            | 0.193 |
| hsa-miR-320d    | 0.64<br>(0.539)               | 0.68<br>(0.539)                 | 0.44<br>(0.022)                | 0.027 | 2.55<br>(0.408)               | 0.66<br>(0.890) | 3.85<br>(0.034) | 0.039 | 2.65            | 1.57            | 0.69            | 0.079 |
| hsa-miR-324-3p  | 49.34                         | 1.00                            | 49.34                          | 0.063 | 0.01                          | 0.01            | 1.02            | 0.064 | 0.02            | 0.02            | 0.02            | 0.064 |
| hsa-miR-324-5p  | 82.82                         | 1.15                            | 95.35                          | 0.055 | 0.89                          | 68.06           | 0.01            | 0.058 | 0.89            | 64.05           | 68.06           | 0.058 |
| hsa-miR-32-5p   | 0.02<br>(0.539)               | 0.47<br>(0.539)                 | <b>0.01</b><br><b>(0.022)</b>  | 0.027 | <b>0.02</b><br><b>(0.022)</b> | 0.53<br>(0.539) | 0.04<br>(0.539) | 0.027 | 1.10            | 6.99            | 28.49           | 0.107 |
| hsa-miR-326     | 28.51                         | 0.01                            | 0.31                           | 0.092 | 0.02                          | 0.61            | 0.03            | 0.082 | 0.03            | 0.70            | 0.90            | 0.105 |
| hsa-miR-328-3p  | 0.71<br>(0.990)               | 74.23<br>(0.051)                | 52.99<br>(0.303)               | 0.051 | 0.01                          | 0.53            | 0.02            | 0.067 | 0.01<br>(0.051) | 0.78<br>(0.990) | 0.72<br>(0.408) | 0.051 |
| hsa-miR-331-3p  | <b>0.01</b><br><b>(0.034)</b> | 1.64<br>(0.890)                 | 0.01<br>(0.408)                | 0.039 | 0.02                          | 0.95            | 0.02            | 0.061 | 0.03            | 1.63            | 1.76            | 0.061 |
| hsa-miR-335-3p  | 50.45                         | 0.86                            | 43.19                          | 0.058 | <b>0.01</b><br><b>(0.022)</b> | 0.32<br>(0.539) | 0.03<br>(0.539) | 0.027 | 0.02            | 1.36            | 0.87            | 0.067 |
| hsa-miR-338-3p  | 0.19                          | 81.21                           | 15.65                          | 0.092 | 1.00                          | 75.88           | 0.01            | 0.063 | 0.05            | 2.16            | 3.56            | 0.092 |
| hsa-miR-339-3p  | 62.92                         | 0.90                            | 56.39                          | 0.058 | 0.91                          | 41.67           | 0.02            | 0.058 | 0.99            | 47.66           | 45.15           | 0.064 |
| hsa-miR-339-5p  | 0.58<br>(0.890)               | <b>119.87</b><br><b>(0.034)</b> | 69.93<br>(0.408)               | 0.039 | 0.01                          | 1.01            | 0.01            | 0.067 | 0.02            | 1.10            | 2.22            | 0.067 |
| hsa-miR-342-3p  | 0.60                          | 1.17                            | 0.70                           | 0.288 | 1.41                          | 1.13            | 1.25            | 0.079 | 1.72<br>(0.539) | 0.72<br>(0.539) | 1.38<br>(0.028) | 0.027 |
| hsa-miR-34a-5p  | 0.20                          | 1.40                            | 0.28                           | 0.55  | 1.00                          | 6.76            | 0.15            | 0.106 | 1.00            | 37.05           | 6.76            | 0.063 |
| hsa-miR-361-5p  | 31.50<br>(0.303)              | 0.02<br>(0.051)                 | 0.70<br>(0.990)                | 0.051 | 0.02                          | 1.14            | 0.02            | 0.067 | 0.80            | 1.05            | 45.50           | 0.202 |
| hsa-miR-363-3p  | 0.45<br>(0.539)               | <b>138.59</b><br><b>(0.022)</b> | 63.02<br>(0.539)               | 0.027 | 4.91                          | 0.71            | 6.96            | 0.061 | 1.44            | 0.64            | 0.21            | 0.252 |
| hsa-miR-374a-5p | 40.32<br>(0.470)              | 1.29<br>(0.699)                 | <b>52.14</b><br><b>(0.027)</b> | 0.032 | 0.01<br>(0.051)               | 0.64<br>(0.990) | 0.02<br>(0.303) | 0.051 | 0.02            | 1.22            | 0.69            | 0.067 |

|                 |                                |                                 |                               |       |                                 |                  |                                |       |                               |                 |                                 |       |
|-----------------|--------------------------------|---------------------------------|-------------------------------|-------|---------------------------------|------------------|--------------------------------|-------|-------------------------------|-----------------|---------------------------------|-------|
| hsa-miR-374b-5p | 1.22                           | 49.60                           | 60.46                         | 0.061 | 0.03<br>(0.539)                 | 2.06<br>(0.539)  | <b>0.01</b><br><b>(0.022)</b>  | 0.027 | 0.02                          | 0.96            | 1.45                            | 0.067 |
| hsa-miR-375     | 0.22<br>(0.539)                | <b>195.35</b><br><b>(0.022)</b> | 42.75<br>(0.539)              | 0.027 | <b>0.01</b><br><b>(0.022)</b>   | 0.22 v           | 0.03<br>(0.539)                | 0.027 | 11.12<br>(0.539)              | 0.11 (0.539)    | <b>427.55</b><br><b>(0.028)</b> | 0.027 |
| hsa-miR-376a-3p | 66.12                          | 1.00                            | 66.12                         | 0.063 | 0.01                            | 0.80             | 0.01                           | 0.061 | 0.02                          | 1.23            | 1.53                            | 0.067 |
| hsa-miR-376c-3p | 34.09                          | 1.18                            | 40.38                         | 0.058 | 0.02                            | 0.85             | 0.02                           | 0.067 | 0.02                          | 1.18            | 1.08                            | 0.061 |
| hsa-miR-378a-3p | 0.14<br>(0.539)                | 0.51<br>(0.539)                 | <b>0.07</b><br><b>(0.022)</b> | 0.027 | 4.73<br>(0.539)                 | 0.39<br>(0.539)  | <b>12.24</b><br><b>(0.022)</b> | 0.027 | 2.20                          | 0.57            | 0.18                            | 0.079 |
| hsa-miR-382-5p  | 37.50                          | 1.10                            | 41.63                         | 0.064 | 0.02                            | 1.00             | 0.02                           | 0.067 | 0.03                          | 1.29            | 1.41                            | 0.061 |
| hsa-miR-409-3p  | <b>67.32</b><br><b>(0.027)</b> | 0.89<br>(0.699)                 | 59.60<br>(0.470)              | 0.032 | 0.01                            | 0.43             | 0.01                           | 0.061 | 0.02                          | 1.42            | 1.33                            | 0.067 |
| hsa-miR-421     | 31.58                          | 1.00                            | 31.58                         | 0.063 | <b>0.01</b><br><b>(0.034)</b>   | 0.48<br>(0.890)  | 0.03<br>(0.408)                | 0.039 | <b>0.02</b><br><b>(0.022)</b> | 0.64 (0.539)    | 0.63<br>(0.539)                 | 0.027 |
| hsa-miR-423-3p  | 183.06                         | 1.00                            | 183.06                        | 0.063 | 0.004                           | 0.84             | 0.005                          | 0.061 | 0.004                         | 0.69            | 0.84                            | 0.067 |
| hsa-miR-423-5p  | 1.72                           | 0.54                            | 0.93                          | 0.561 | 1.67                            | 1.21             | 1.39                           | 0.587 | 1.64                          | 0.80            | 1.18                            | 0.177 |
| hsa-miR-424-5p  | 0.01                           | 126.48                          | 1.00                          | 0.063 | <b>291.39</b><br><b>(0.022)</b> | 26.76<br>(0.539) | 10.89<br>(0.539)               | 0.027 | 0.02                          | 0.02            | 0.00                            | 0.063 |
| hsa-miR-425-3p  | 47.85                          | 0.93                            | 44.29                         | 0.058 | 0.01                            | 1.00             | 0.01                           | 0.067 | 0.03                          | 1.23            | 1.89                            | 0.061 |
| hsa-miR-425-5p  | 91.97<br>(0.408)               | <b>0.01</b><br><b>(0.034)</b>   | 0.50<br>(0.890)               | 0.039 | 0.01                            | 0.62             | 0.01                           | 0.067 | 1.28                          | 0.89            | 124.48                          | 0.561 |
| hsa-miR-451a    | 0.26                           | 1.10                            | 0.28                          | 0.067 | 2.68                            | 0.54             | 4.95<br>(0.022)                | 0.027 | 0.88                          | 0.31            | 0.18                            | 0.067 |
| hsa-miR-454-3p  | <b>49.88</b><br><b>(0.027)</b> | 0.76<br>(0.699)                 | 37.92<br>(0.470)              | 0.032 | <b>0.01</b><br><b>(0.022)</b>   | 0.50<br>(0.539)  | 0.03<br>(0.539)                | 0.027 | 0.02                          | 0.63            | 0.88                            | 0.063 |
| hsa-miR-483-5p  | 39.02<br>(0.539)               | <b>0.04</b><br><b>(0.022)</b>   | 0.14<br>(0.539)               | 0.027 | 2.29<br>(0.408)                 | 0.27<br>(0.890)  | <b>8.59</b><br><b>(0.034)</b>  | 0.039 | 0.01                          | 0.96            | 0.00                            | 0.061 |
| hsa-miR-484     | 0.31<br>(0.022)                | 1.58<br>(0.539)                 | 0.50<br>(0.539)               | 0.027 | 1.53                            | 0.69             | 2.23                           | 0.079 | 1.25                          | 0.67            | 0.56                            | 0.202 |
| hsa-miR-485-3p  | 64.07                          | 1.00                            | 64.07                         | 0.063 | 0.01                            | 0.55             | 0.02                           | 0.051 | 0.02                          | 0.02            | 1.08                            | 0.058 |
| hsa-miR-486-5p  | 1.59<br>(0.539)                | 0.23<br>(0.022)                 | 0.37<br>(0.539)               | 0.027 | 1.79<br>(0.539)                 | 0.21<br>(0.539)  | <b>8.35</b><br><b>(0.022)</b>  | 0.027 | 3.73<br>(0.408)               | 0.81<br>(0.890) | 0.45<br>(0.034)                 | 0.039 |
| hsa-miR-495-3p  | 4.15                           | 0.04                            | 0.18                          | 0.092 | 0.03                            | 0.13             | 0.27                           | 0.292 | 0.06                          | 0.72            | 0.22                            | 0.105 |
| hsa-miR-501-3p  | 1.28                           | 0.78                            | 1.00                          | 0.723 | 0.01                            | 0.01             | 0.84                           | 0.064 | <b>0.02</b><br><b>(0.022)</b> | 0.40<br>(0.539) | 0.02<br>(0.539)                 | 0.027 |
| hsa-miR-502-3p  | 1.31                           | 1.00                            | 1.31                          | 0.723 | 0.02                            | 0.03             | 0.76                           | 0.058 | 0.76                          | 15.02           | 1.00                            | 0.058 |

|                |                  |                                |                                |       |                               |                 |                                 |       |                               |                 |                 |       |
|----------------|------------------|--------------------------------|--------------------------------|-------|-------------------------------|-----------------|---------------------------------|-------|-------------------------------|-----------------|-----------------|-------|
| hsa-miR-505-3p | 38.61            | 1.00                           | 38.61                          | 0.063 | <b>0.01</b><br><b>(0.022)</b> | 0.21<br>(0.539) | 0.02<br>(0.539)                 | 0.027 | 0.01                          | 0.01            | 0.38            | 0.055 |
| hsa-miR-532-3p | 33.02            | 0.89                           | 29.46                          | 0.058 | 1.00                          | 60.70           | 0.02                            | 0.063 | 0.02                          | 0.02            | 0.94            | 0.063 |
| hsa-miR-532-5p | 0.43<br>(0.539)  | 0.73<br>(0.539)                | 0.31<br>(0.022)                | 0.027 | 0.77                          | 13.39           | 0.06                            | 0.058 | 2.90                          | 0.99            | 50.54           | 0.061 |
| hsa-miR-543    | 9.03             | 1.00                           | 9.03                           | 0.106 | 0.03                          | 1.68            | 0.02                            | 0.077 | 0.05                          | 0.79            | 2.78            | 0.105 |
| hsa-miR-574-3p | 0.75             | 2.18                           | 1.63                           | 0.148 | 0.03<br>(0.303)               | 2.12<br>(0.990) | 0.01<br>(0.051)                 | 0.051 | 0.01                          | 1.09            | 0.94            | 0.067 |
| hsa-miR-584-5p | 41.79            | 0.91                           | 37.90                          | 0.058 | 0.01                          | 0.81            | 0.02                            | 0.067 | 0.02                          | 1.21            | 1.39            | 0.061 |
| hsa-miR-590-5p | 0.53<br>(0.408)  | 0.67<br>(0.890)                | 0.36<br>(0.034)                | 0.039 | 4.60                          | 1.37            | 3.36                            | 0.061 | 2.08                          | 1.12            | 0.62            | 0.061 |
| hsa-miR-629-5p | 0.20             | 0.72                           | 0.15                           | 0.55  | 5.01<br>(0.539)               | 0.23<br>(0.539) | <b>21.97</b><br><b>(0.022)</b>  | 0.027 | 0.02                          | 0.45            | 0.00            | 0.055 |
| hsa-miR-652-3p | 0.98             | 112.99                         | 110.34                         | 0.061 | 0.01<br>(0.051)               | 0.64<br>(0.303) | 0.01<br>(0.990)                 | 0.051 | 0.02                          | 1.12            | 1.82            | 0.430 |
| hsa-miR-660-5p | 1.00             | 1.00                           | 1.00                           | 1.000 | 3.45<br>(0.539)               | 0.02<br>(0.539) | <b>164.86</b><br><b>(0.022)</b> | 0.027 | <b>0.02</b><br><b>(0.022)</b> | 0.54<br>(0.539) | 0.00<br>(0.539) | 0.027 |
| hsa-miR-7-5p   | 13.02            | 0.02                           | 0.29                           | 0.092 | 1.00                          | 6.20            | 0.16                            | 0.106 | <b>0.02</b><br><b>(0.027)</b> | 0.15            | 0.15            | 0.032 |
| hsa-miR-766-3p | 0.52<br>(0.539)  | <b>63.76</b><br><b>(0.022)</b> | 33.10<br>(0.539)               | 0.027 | <b>0.01</b><br><b>(0.034)</b> | 0.78<br>(0.890) | 0.02<br>(0.408)                 | 0.039 | 0.02<br>(0.539)               | 3.35<br>(0.539) | 1.45<br>(0.022) | 0.027 |
| hsa-miR-874-3p | 16.39            | 0.76                           | 12.41                          | 0.058 | 0.02                          | 0.02            | 1.00                            | 0.063 | 0.76                          | 1.00            | 0.76            | 0.723 |
| hsa-miR-877-5p | 37.53<br>(0.539) | <b>0.012</b><br><b>(0.022)</b> | 0.45<br>(0.539)                | 0.027 | 0.74                          | 33.42           | 0.02                            | 0.063 | <b>0.01</b><br><b>(0.022)</b> | 0.56<br>(0.539) | 0.38<br>(0.539) | 0.027 |
| hsa-miR-885-5p | 7.21<br>(0.699)  | <b>0.01</b><br><b>(0.027)</b>  | 0.06<br>(0.470)                | 0.032 | 1.00                          | 6.18            | 0.16                            | 0.106 | 0.02                          | 0.59            | 0.14            | 0.129 |
| hsa-miR-92a-3p | 1.61             | 0.55                           | 0.89                           | 0.061 | 2.23                          | 0.98            | 2.29                            | 0.061 | 1.62<br>(0.539)               | 0.76<br>(0.539) | 0.71<br>(0.022) | 0.027 |
| hsa-miR-92b-3p | 32.41            | 0.77                           | 24.99                          | 0.058 | 0.01                          | 0.01            | 0.77                            | 0.058 | 1.00                          | 39.60           | 1.30            | 0.063 |
| hsa-miR-93-3p  | 78.27            | 0.01                           | 0.77                           | 0.061 | <b>0.01</b><br><b>(0.034)</b> | 0.52<br>(0.890) | 0.03<br>(0.408)                 | 0.039 | 2.01                          | 0.77            | 73.21           | 0.061 |
| hsa-miR-93-5p  | 0.68             | 1.78                           | 1.20                           | 0.177 | 0.84                          | 0.86            | 0.97                            | 0.252 | 1.37                          | 1.98            | 1.41            | 0.079 |
| hsa-miR-99a-5p | 1.15             | 0.87                           | 1.00                           | 0.723 | <b>0.01</b><br><b>(0.022)</b> | 0.48<br>(0.539) | 0.02<br>(0.539)                 | 0.027 | 0.02<br>(0.051)               | 0.79<br>(0.990) | 1.06<br>(0.303) | 0.051 |
| hsa-miR-99b-5p | 1.79<br>(0.809)  | 50.77<br>(0.408)               | <b>90.83</b><br><b>(0.034)</b> | 0.039 | 0.01                          | 1.37            | 0.01                            | 0.067 | 0.03<br>(0.408)               | 1.97<br>(0.809) | 3.22<br>(0.034) | 0.039 |

Expressions for each miRNAs from K2EDTA, PPP and PPT samples and each storage condition were compared through Kruskal-Wallis test.  $P < 0.05$  was considered statistically significant. Dunn's multiple comparison test was performed for comparison between two storage conditions, only for significant Kruskal-Wallis test. Differences in miRNA expression between two conditions is reported as the ratio of miRNA expression of an "experimental" condition and a "reference" condition (fold change). Results are reported only



for miRNAs with a statistically significant  $\geq \pm 5$ -fold change, in at least one comparison. K2EDTA - dipotassium ethylenediaminetetraacetate tubes. PPT – plasma preparation tubes. PPP- platelet-poor plasma.

**Supplementary Table 2.** Detected and undetected miRNA comparison between groups

| COLLECTION CONDITION<br>(N = 179) | Detected miRNAs, N (%) | Undetected miRNAs, N (%) | $\chi^2$ Test | P       |
|-----------------------------------|------------------------|--------------------------|---------------|---------|
| <b>- 80°C</b>                     |                        |                          |               |         |
| <i>K2EDTA</i>                     | 96 (53.63%)            | 83 (46.37%)              | 0.41          | 0.523   |
| <i>PPP</i>                        | 103(57.54%)            | 76 (42.46%)              |               |         |
| <i>PPP</i>                        | 103(57.54%)            | 76 (42.46%)              | 46.87         | < 0.001 |
| <i>PPT</i>                        | 161 (89.94%)           | 18 (10.06%)              |               |         |
| <b>24h RT</b>                     |                        |                          |               |         |
| <i>K2EDTA</i>                     | 136 (75.98%)           | 43 (24.02%)              | 5.95          | 0.015   |
| <i>PPT</i>                        | 155 (86.59%)           | 24 (13.41%)              |               |         |
| <i>K2EDTA</i>                     | 136 (75.98%)           | 43 (24.02%)              | 44.19         | < 0.001 |
| <i>PPP</i>                        | 73 (40.78%)            | 106 (59.22%)             |               |         |
| <i>PPP</i>                        | 73 (40.78%)            | 106 (59.22%)             | 79.24         | < 0.001 |
| <i>PPT</i>                        | 155 (86.59%)           | 24 (13.41%)              |               |         |
| <b>24h 4°C</b>                    |                        |                          |               |         |
| <i>K2EDTA</i>                     | 159 (88.83%)           | 20 (11.17%)              | 0.03          | 0.869   |
| <i>PPT</i>                        | 157 (87.71%)           | 22 (12.29%)              |               |         |
| <i>K2EDTA</i>                     | 159 (88.83%)           | 20 (11.17%)              | 85            | < 0.001 |
| <i>PPP</i>                        | 75 (41.90%)            | 104 (58.10%)             |               |         |
| <i>PPP</i>                        | 75 (41.90%)            | 104 (58.10%)             | 80.35         | < 0.001 |
| <i>PPT</i>                        | 157 (87.71%)           | 22 (12.29%)              |               |         |

The comparisons, between conditions, were performed using Pearson's Chi-Square test with Yates' continuity correction. P-Value is shown for all comparisons. RT – room temperature. K2EDTA - dipotassium ethylenediaminetetraacetate tubes. PPP- platelet-poor plasma. PPT - plasma-preparation tubes.

**Supplementary Table 3.** Detected and undetected miRNA comparison within group

| STORAGE CONDITION<br>(N = 179) | Detected miRNAs, N (%) | Undetected miRNAs, N (%) | $\chi^2$ Test | P       |
|--------------------------------|------------------------|--------------------------|---------------|---------|
| <b><i>K2EDTA</i></b>           |                        |                          |               |         |
| - 80°C                         | 96 (53.63%)            | 83 (46.37%)              | 18.63         | < 0.001 |
| 24h RT                         | 136 (75.98%)           | 43 (24.02%)              |               |         |
| - 80°C                         | 96 (53.63%)            | 83 (46.37%)              | 52.39         | < 0.001 |
| 24h 4°C                        | 159 (88.83%)           | 20 (11.17%)              |               |         |
| 24h RT                         | 136 (75.98%)           | 43 (24.02%)              | 9.32          | 0.002   |
| 24h 4°C                        | 159 (88.83%)           | 20 (11.17%)              |               |         |
| <b><i>PPP</i></b>              |                        |                          |               |         |
| - 80°C                         | 103 (57.54%)           | 76 (42.46%)              | 9.4           | 0.002   |
| 24h RT                         | 73 (40.78%)            | 106 (59.22%)             |               |         |
| - 80°C                         | 103 (57.54%)           | 76 (42.46%)              | 8.14          | 0.004   |
| 24h 4°C                        | 75 (41.90%)            | 104 (58.10%)             |               |         |
| 24h RT                         | 73 (40.78%)            | 106 (59.22%)             | 0.01          | 0.914   |
| 24h 4°C                        | 75 (41.90%)            | 104 (58.10%)             |               |         |
| <b><i>PPT</i></b>              |                        |                          |               |         |
| - 80°C                         | 161 (89.94%)           | 18 (10.06%)              | 0.67          | 0.411   |
| 24h RT                         | 155 (86.59%)           | 24 (13.41%)              |               |         |
| - 80°C                         | 161 (89.94%)           | 18 (10.06%)              | 0.25          | 0.615   |
| 24h 4°C                        | 157 (87.71%)           | 22 (12.29%)              |               |         |
| 24h RT                         | 155 (86.59%)           | 24 (13.41%)              | 0.02          | 0.874   |
| 24h 4°C                        | 157 (87.71%)           | 22 (12.29%)              |               |         |

The comparisons, between conditions, were performed using Pearson's Chi-Square test with Yates' continuity correction. P-Value is shown for all comparisons. RT – room temperature. K2EDTA - dipotassium ethylenediaminetetraacetate tubes. PPP- platelet-poor plasma. PPT - plasma-preparation tubes.

**Supplementary Table 4.** Matched detected and undetected miRNAs in between-group comparison

|               |                          | <b>- 80°C</b>          |                          |                           |          | <b>24h RT</b>          |                          |                           |          | <b>24h 4°C</b>         |                          |                           |          |
|---------------|--------------------------|------------------------|--------------------------|---------------------------|----------|------------------------|--------------------------|---------------------------|----------|------------------------|--------------------------|---------------------------|----------|
| <b>N=179</b>  |                          | <b>Detected miRNAs</b> | <b>Undetected miRNAs</b> | <b>χ<sup>2</sup> Test</b> | <b>P</b> | <b>Detected miRNAs</b> | <b>Undetected miRNAs</b> | <b>χ<sup>2</sup> Test</b> | <b>P</b> | <b>Detected miRNAs</b> | <b>Undetected miRNAs</b> | <b>χ<sup>2</sup> Test</b> | <b>P</b> |
| <b>K2EDTA</b> |                          |                        |                          |                           |          |                        |                          |                           |          |                        |                          |                           |          |
| <b>PPP</b>    | <b>Detected miRNAs</b>   | 75<br>(41.89%)         | 30<br>(16.76%)           | 1.25                      | 0.262    | 68<br>(37.99%)         | 5<br>(2.79%)             | 52.66                     | < 0.001  | 73<br>(40.78%)         | 1<br>(0.56%)             | 81.1                      | < 0.001  |
|               | <b>Undetected miRNAs</b> | 21<br>(11.73%)         | 53<br>(29.61%)           |                           |          | 68<br>(37.99%)         | 38<br>(21.23%)           |                           |          | 86<br>(48.04%)         | 19<br>(10.61%)           |                           |          |
| <b>K2EDTA</b> |                          |                        |                          |                           |          |                        |                          |                           |          |                        |                          |                           |          |
| <b>PPT</b>    | <b>Detected miRNAs</b>   | 93<br>(51.95%)         | 68<br>(37.99%)           | 57.69                     | < 0.001  | 126<br>(70.39%)        | 30<br>(16.76%)           | 9.02                      | < 0.001  | 145<br>(81.00%)        | 12<br>(6.70%)            | 0.038                     | 0.844    |
|               | <b>Undetected miRNAs</b> | 3<br>(1.68%)           | 15<br>(8.38%)            |                           |          | 10<br>(5.59%)          | 13<br>(7.26%)            |                           |          | 14<br>(7.82%)          | 8<br>(4.47%)             |                           |          |
| <b>PPT</b>    |                          |                        |                          |                           |          |                        |                          |                           |          |                        |                          |                           |          |
| <b>PPP</b>    | <b>Detected miRNAs</b>   | 98<br>(54.75%)         | 5<br>(2.79%)             | 50.7                      | < 0.001  | 72<br>(40.22%)         | 1<br>(0.56%)             | 78.11                     | < 0.001  | 73<br>(40.78%)         | 2<br>(1.12%)             | 77.29                     | < 0.001  |
|               | <b>Undetected miRNAs</b> | 66<br>(36.87%)         | 10<br>(5.59%)            |                           |          | 83<br>(46.37%)         | 23<br>(12.85%)           |                           |          | 85<br>(47.47%)         | 19<br>(10.61%)           |                           |          |

Number of matched detected and undetected miRNAs are expressed as absolute and percentage values. The comparisons, between conditions, were performed using McNeman's test Chi-Square test with continuity correction. P-Value is shown for all comparisons. RT – room temperature. K2EDTA - dipotassium ethylenediaminetetraacetate tubes. PPP- platelet-poor plasma. PPT - plasma-preparation tubes.

**Supplementary Table 5.** Matched detected and undetected miRNA in within-group comparison

|                |                          | K2EDTA          |                   |               |         | PPP             |                   |               |         | PPT             |                   |               |       |
|----------------|--------------------------|-----------------|-------------------|---------------|---------|-----------------|-------------------|---------------|---------|-----------------|-------------------|---------------|-------|
|                |                          | Detected miRNAs | Undetected miRNAs | $\chi^2$ Test | P       | Detected miRNAs | Undetected miRNAs | $\chi^2$ Test | P       | Detected miRNAs | Undetected miRNAs | $\chi^2$ Test | P     |
| <b>- 80°C</b>  |                          |                 |                   |               |         |                 |                   |               |         |                 |                   |               |       |
| <b>24h RT</b>  | <b>Detected miRNAs</b>   | 88<br>(49.16%)  | 48<br>(26.82%)    | 27.16         | < 0.001 | 64<br>(35.75%)  | 9<br>(5.03%)      | 17.52         | < 0.001 | 146<br>(81.56%) | 9<br>(5.08%)      | 1.04          | 0.307 |
|                | <b>Undetected miRNAs</b> | 8<br>(4.47%)    | 35<br>(19.55%)    |               |         | 39<br>(21.79%)  | 67<br>(37.43%)    |               |         | 15<br>(8.38%)   | 9<br>(5.08%)      |               |       |
| <b>- 80°C</b>  |                          |                 |                   |               |         |                 |                   |               |         |                 |                   |               |       |
| <b>24h 4°C</b> | <b>Detected miRNAs</b>   | 93<br>(51.95%)  | 66<br>(36.87%)    | 55.71         | < 0.001 | 66<br>(36.87%)  | 9<br>(5.03%)      | 15.48         | < 0.001 | 144<br>(80.45%) | 12<br>(6.70%)     | 0.55          | 0.458 |
|                | <b>Undetected miRNAs</b> | 3<br>(1.68%)    | 17<br>(9.50%)     |               |         | 37<br>(20.67%)  | 67<br>(37.43%)    |               |         | 17<br>(9.50%)   | 6<br>(3.35%)      |               |       |
| <b>24h RT</b>  |                          |                 |                   |               |         |                 |                   |               |         |                 |                   |               |       |
| <b>24h 4°C</b> | <b>Detected miRNAs</b>   | 129<br>(72.07%) | 30<br>(16.76%)    | 13.08         | < 0.001 | 61<br>(34.08%)  | 13<br>(7.26%)     | 0             | 1.000   | 144<br>(80.45%) | 13<br>(7.26%)     | 0.04          | 0.838 |
|                | <b>Undetected miRNAs</b> | 7<br>(3.91%)    | 13<br>(7.26%)     |               |         | 12<br>(6.70%)   | 93<br>(51.95%)    |               |         | 11<br>(6.14%)   | 11<br>(6.14%)     |               |       |

Number of detected and undetected miRNAs are expressed as absolute and percentage values. The comparisons, between conditions, were performed using McNemar's Chi-Square test with continuity correction. P-Value is shown for all comparisons. RT – room temperature. K2EDTA - dipotassium ethylenediaminetetraacetate tubes. PPP- platelet-poor plasma. PPT - plasma-preparation tubes.

**Supplementary Table 6.** Within-group comparison of circulating miRNA expression

| miRNAs,<br>fold change (P) | WITHIN-GROUP ANALYSIS |                      |                      |       |                     |                      |                      |       |                     |                      |                         |       |
|----------------------------|-----------------------|----------------------|----------------------|-------|---------------------|----------------------|----------------------|-------|---------------------|----------------------|-------------------------|-------|
|                            | K2EDTA                |                      |                      |       | PPP                 |                      |                      |       | PPT                 |                      |                         |       |
|                            | 24h RT<br>vs - 80°C   | 24h 4°C<br>vs - 80°C | 24h 4°C vs<br>24h RT | P     | 24h RT<br>vs - 80°C | 24h 4°C vs<br>- 80°C | 24h 4°C<br>vs 24h RT | P     | 24h RT<br>vs - 80°C | 24h 4°C<br>vs - 80°C | 24h 4°C vs<br>24h RT    | P     |
| hsa-let-7a-5p              | 2.08<br>(0.051)       | 1.11<br>(0.990)      | 0.53<br>(0.303)      | 0.051 | 0.87                | 0.82                 | 0.93                 | 0.67  | 1.21<br>(0.990)     | 0.54<br>(0.303)      | 0.45<br>(0.051)         | 0.051 |
| hsa-let-7b-3p              | 1.29                  | 1.17                 | 0.91                 | 0.782 | 1.00                | 1.00                 | 1.00                 | 1.000 | 0.48<br>(0.990)     | 0.04<br>(0.051)      | 0.08<br>(0.303)         | 0.051 |
| hsa-let-7b-5p              | 1.56                  | 1.10                 | 0.71                 | 0.113 | 0.26<br>(0.022)     | 0.49<br>(0.539)      | 1.89<br>(0.539)      | 0.027 | 0.55                | 0.55                 | 0.98                    | 0.067 |
| hsa-let-7c-5p              | 2.00                  | 0.77                 | 0.38                 | 0.113 | 0.02                | 0.02                 | 0.97                 | 0.064 | 0.92                | 0.40                 | 0.44                    | 0.252 |
| hsa-let-7d-3p              | 0.64                  | 0.59                 | 0.92                 | 0.118 | 1.29                | 1.61                 | 1.25                 | 0.288 | 1.68                | 1.31                 | 0.78                    | 0.252 |
| hsa-let-7d-5p              | 2.64                  | 1.49                 | 0.56                 | 0.148 | 0.02                | 0.76                 | 36.75                | 0.061 | 0.92                | 0.72                 | 0.78                    | 0.491 |
| hsa-let-7e-5p              | 62.89                 | 72.78                | 1.16                 | 0.067 | 0.01                | 0.95                 | 78.05                | 0.067 | 1.41                | 0.72                 | 0.51                    | 0.252 |
| hsa-let-7f-5p              | 1.67                  | 0.77                 | 0.46                 | 0.252 | 1.19                | 0.83                 | 0.70                 | 0.252 | 1.32                | 0.72                 | 0.54                    | 0.113 |
| hsa-let-7g-5p              | 1.15                  | 1.11                 | 0.96                 | 0.875 | 0.86                | 0.59                 | 0.69                 | 0.252 | 0.76<br>(0.990)     | 0.43<br>(0.051)      | 0.56<br>(0.303)         | 0.051 |
| hsa-let-7i-5p              | 1.61                  | 0.93                 | 0.57                 | 0.43  | 1.05                | 1.32                 | 1.25                 | 0.491 | 1.02                | 0.72                 | 0.70                    | 0.43  |
| hsa-miR-1                  | 51.98<br>(0.303)      | 57.33<br>(0.051)     | 1.10<br>(0.990)      | 0.051 | 0.02                | 0.02                 | 1.00                 | 0.106 | 0.48                | 0.90                 | 1.86                    | 0.55  |
| hsa-miR-101-3p             | 0.18<br>(0.051)       | 0.39<br>(0.408)      | 2.13<br>(0.890)      | 0.051 | 1.08                | 1.12                 | 1.04                 | 0.733 | 0.53                | 0.76                 | 1.44                    | 0.561 |
| hsa-miR-103a-3p            | 0.56                  | 0.46                 | 0.81                 | 0.061 | 2.20                | 1.13                 | 0.51                 | 0.113 | 1.55                | 0.69                 | 0.45                    | 0.099 |
| hsa-miR-106a-5p            | 0.57<br>(0.408)       | 1.18<br>(0.890)      | 2.07<br>(0.034)      | 0.039 | 0.61                | 1.53                 | 2.52                 | 0.113 | 1.51                | 0.51                 | 0.33                    | 0.067 |
| hsa-miR-106b-3p            | 1.34                  | 58.43                | 43.52                | 0.058 | 0.74                | 0.74                 | 1.00                 | 0.723 | 1.46<br>(0.890)     | 0.04<br>(0.408)      | <b>0.03<br/>(0.034)</b> | 0.039 |
| hsa-miR-106b-5p            | 0.47                  | 0.77                 | 1.64                 | 0.587 | 0.00                | 0.77                 | 319.28               | 0.067 | 0.45                | 0.85                 | 1.89                    | 0.329 |
| hsa-miR-107                | 0.80                  | 0.44                 | 0.55                 | 0.329 | 1.04                | 0.58                 | 0.55                 | 0.113 | 0.73                | 0.83                 | 1.14                    | 0.837 |

|                 |                         |                  |                  |       |                          |                        |                 |       |                  |                        |                 |       |
|-----------------|-------------------------|------------------|------------------|-------|--------------------------|------------------------|-----------------|-------|------------------|------------------------|-----------------|-------|
| hsa-miR-10b-5p  | 0.78                    | 0.92             | 1.17             | 0.782 | <b>253.03</b><br>(0.022) | 186.35<br>(0.539)      | 0.74<br>(0.539) | 0.027 | 18.71<br>(0.303) | 32.18<br>(0.051)       | 1.72<br>(0.539) | 0.051 |
| hsa-miR-122-5p  | 0.36                    | 0.83             | 2.32             | 0.113 | 0.45                     | 0.69                   | 1.55            | 0.079 | 0.15             | 0.34                   | 2.24            | 0.058 |
| hsa-miR-125a-5p | 1.25                    | 0.47             | 0.37             | 0.099 | <b>123.58</b><br>(0.022) | 58.10<br>(0.539)       | 0.47<br>(0.539) | 0.027 | 1.66             | 1.29                   | 0.77            | 0.148 |
| hsa-miR-125b-5p | <b>0.005</b><br>(0.022) | 0.21<br>(0.539)  | 40.46<br>(0.539) | 0.027 | 0.89                     | 0.89                   | 1.00            | 0.965 | 0.51<br>(0.539)  | <b>0.03</b><br>(0.022) | 0.05<br>(0.539) | 0.027 |
| hsa-miR-1260a   | 92.77                   | 67.38            | 0.73             | 0.061 | 0.94                     | 0.94                   | 1.00            | 0.723 | 0.91             | 1.23                   | 1.36            | 0.393 |
| hsa-miR-126-3p  | 0.79                    | 0.72             | 0.92             | 0.193 | 1.40                     | 1.07                   | 0.76            | 0.177 | 0.91<br>(0.539)  | 0.74<br>(0.022)        | 0.81<br>(0.539) | 0.027 |
| hsa-miR-126-5p  | 1.62                    | 1.17             | 0.72             | 0.393 | 0.91                     | 0.46                   | 0.50            | 0.43  | 2.01             | 2.16                   | 1.07            | 0.067 |
| hsa-miR-127-3p  | 40.96                   | 40.81            | 1.00             | 0.088 | 1.00                     | 1.00                   | 1.00            | 1.000 | 2.02             | 1.17                   | 0.58            | 0.061 |
| hsa-miR-128-3p  | 1.00                    | 51.59            | 51.59            | 0.063 | 1.13                     | 1.28                   | 1.13            | 0.243 | 53.70            | 36.58                  | 0.68            | 0.061 |
| hsa-miR-130a-3p | 56.18                   | 54.99            | 0.98             | 0.067 | 1.81                     | 1.60                   | 0.88            | 0.634 | 1.94             | 2.04                   | 1.05            | 0.288 |
| hsa-miR-130b-3p | 0.60                    | 14.36            | 23.84            | 0.074 | 0.76                     | 0.76                   | 1.00            | 0.723 | 1.00             | 1.00                   | 1.00            | 1.000 |
| hsa-miR-132-3p  | 144.39<br>(0.051)       | 53.38<br>(0.303) | 0.37<br>(0.990)  | 0.051 | 0.92                     | 0.97                   | 1.05            | 0.782 | 1.83<br>(0.408)  | 2.69<br>(0.034)        | 1.47<br>(0.890) | 0.039 |
| hsa-miR-133b    | 1.00                    | 1.75             | 1.75             | 0.106 | 1.00                     | 1.00                   | 1.00            | 1.000 | 1.00             | 26.98                  | 26.98           | 0.063 |
| hsa-miR-139-5p  | 0.96                    | 0.84             | 0.87             | 0.957 | 1.00                     | 1.05                   | 1.05            | 0.869 | 0.93             | 0.56                   | 0.60            | 0.099 |
| hsa-miR-140-3p  | 0.61                    | 1.91             | 3.11             | 0.099 | 0.82                     | 1.74                   | 2.12            | 0.113 | 0.46             | 1.10                   | 2.37            | 0.067 |
| hsa-miR-140-5p  | 1.06                    | 1.00             | 0.94             | 0.723 | 1.06                     | 1.10                   | 1.04            | 0.243 | 0.85             | 1.00                   | 1.18            | 0.301 |
| hsa-miR-142-3p  | <b>0.14</b><br>(0.034)  | 0.31<br>(0.408)  | 2.13<br>(0.890)  | 0.039 | 0.55<br>(0.990)          | 0.24<br>(0.051)        | 0.44<br>(0.303) | 0.051 | 0.33<br>(0.051)  | 0.77<br>(0.990)        | 2.34<br>(0.303) | 0.051 |
| hsa-miR-142-5p  | 0.50                    | 0.36             | 0.72             | 0.061 | 1.00                     | 2.09                   | 2.09            | 0.723 | 0.87             | 1.27                   | 1.46            | 0.837 |
| hsa-miR-143-3p  | 1.00                    | 74.97            | 74.97            | 0.063 | 0.01<br>(0.470)          | <b>0.01</b><br>(0.027) | 0.65<br>(0.699) | 0.032 | 0.84             | 2.15                   | 2.57            | 0.177 |
| hsa-miR-144-3p  | 0.38                    | 0.59             | 1.56             | 0.113 | 4.15                     | 2.37                   | 0.57            | 0.393 | 1.14             | 5.71                   | 5.00            | 0.118 |
| hsa-miR-144-5p  | 105.23                  | 101.23           | 0.96             | 0.061 | 1.04                     | 170.82                 | 164.14          | 0.064 | 0.87             | 0.51                   | 0.58            | 0.301 |
| hsa-miR-145-5p  | 1.31                    | 0.76             | 0.58             | 0.561 | 2.43<br>(0.022)          | 1.63<br>(0.539)        | 0.67<br>(0.539) | 0.027 | 1.67             | 1.16                   | 0.70            | 0.301 |
| hsa-miR-146a-5p | 1.29                    | 1.18             | 0.92             | 0.67  | 2.73<br>(0.051)          | 2.18<br>(0.303)        | 0.80<br>(0.990) | 0.051 | 2.69             | 1.78                   | 0.66            | 0.148 |

|                 |                  |                          |                 |       |                 |                 |                          |       |                 |                 |                 |       |
|-----------------|------------------|--------------------------|-----------------|-------|-----------------|-----------------|--------------------------|-------|-----------------|-----------------|-----------------|-------|
| hsa-miR-146b-5p | 98.96            | 77.99                    | 0.79            | 0.061 | 0.01            | 0.01            | 1.03                     | 0.064 | 1.46            | 1.97            | 1.35            | 0.43  |
| hsa-miR-148a-3p | 113.65           | 118.54                   | 1.04            | 0.067 | 1.00            | 1.00            | 1.00                     | 1.000 | 1.01            | 1.07            | 1.06            | 0.67  |
| hsa-miR-148b-3p | 1.00             | 158.27                   | 158.27          | 0.063 | 1.61<br>(0.539) | 0.01<br>(0.539) | <b>0.003<br/>(0.022)</b> | 0.027 | 1.54            | 1.29            | 0.84            | 0.875 |
| hsa-miR-150-5p  | 1.07             | 0.88                     | 0.83            | 0.875 | 1.19            | 1.34            | 1.13                     | 0.288 | 0.71            | 1.34            | 1.88            | 0.43  |
| hsa-miR-151a-3p | 1.65             | 1.41                     | 0.86            | 0.288 | 1.33            | 0.03            | 0.02                     | 0.061 | 1.16            | 0.96            | 0.83            | 0.957 |
| hsa-miR-151a-5p | 0.71             | 0.52                     | 0.73            | 0.491 | 1.42            | 0.76            | 0.53                     | 0.202 | 1.55            | 1.17            | 0.76            | 0.393 |
| hsa-miR-152-3p  | 0.93             | 0.30                     | 0.32            | 0.061 | 178.87          | 0.59            | 0.00                     | 0.058 | 2.03            | 1.71            | 0.84            | 0.148 |
| hsa-miR-154-5p  | 1.43             | 1.01                     | 0.71            | 0.243 | 1.00            | 1.00            | 1.00                     | 1.000 | 0.94            | 0.03            | 0.03            | 0.061 |
| hsa-miR-155-5p  | 85.98            | 0.91                     | 0.01            | 0.064 | 0.01            | 0.01            | 1.10                     | 0.064 | 0.92            | 1.08            | 1.17            | 0.875 |
| hsa-miR-15a-5p  | 2.55             | 2.53                     | 0.99            | 0.067 | 1.20            | 0.60            | 0.50                     | 0.099 | 1.05            | 0.56            | 0.53            | 0.118 |
| hsa-miR-15b-3p  | 58.60<br>(0.408) | <b>85.52<br/>(0.034)</b> | 1.46<br>(0.990) | 0.039 | 1.01            | 150.74          | 149.81                   | 0.064 | 0.50            | 0.72            | 1.43            | 0.079 |
| hsa-miR-15b-5p  | 0.86             | 0.79                     | 0.92            | 0.731 | 0.02            | 0.01            | 0.71                     | 0.058 | 1.52            | 1.44            | 0.95            | 0.733 |
| hsa-miR-16-2-3p | 80.32            | 75.56                    | 0.94            | 0.067 | 0.01            | 0.01            | 0.88                     | 0.058 | 0.02            | 0.02            | 1.00            | 0.063 |
| hsa-miR-16-5p   | 0.90<br>(0.539)  | 1.10<br>(0.539)          | 1.22<br>(0.022) | 0.027 | 1.23<br>(0.051) | 1.74<br>(0.990) | 1.41<br>(0.303)          | 0.051 | 0.84<br>(0.890) | 1.80<br>(0.408) | 2.15<br>(0.034) | 0.039 |
| hsa-miR-17-5p   | 1.02             | 62.42                    | 61.43           | 0.064 | 1.00            | 1.00            | 1.00                     | 1.000 | 0.86<br>(0.990) | 2.28<br>(0.303) | 2.65<br>(0.051) | 0.051 |
| hsa-miR-181a-5p | 0.90<br>(0.990)  | 0.61<br>(0.303)          | 0.68<br>(0.051) | 0.491 | 0.02            | 0.03            | 1.09                     | 0.064 | 0.76            | 0.33            | 0.44            | 0.252 |
| hsa-miR-185-5p  | 0.61             | 0.41                     | 0.67            | 0.051 | 0.22            | 0.79            | 3.51                     | 0.061 | 1.17<br>(0.990) | 2.19<br>(0.051) | 1.87<br>(0.303) | 0.051 |
| hsa-miR-186-5p  | 59.17            | 1.00                     | 0.02            | 0.063 | 0.47            | 0.47            | 1.00                     | 0.57  | 17.33           | 1.00            | 0.06            | 0.063 |
| hsa-miR-18a-5p  | 1.03             | 0.81                     | 0.79            | 0.587 | 0.03            | 0.02            | 0.83                     | 0.063 | 1.21            | 1.22            | 1.01            | 0.837 |
| hsa-miR-18b-5p  | 0.60             | 0.55                     | 0.92            | 0.118 | 1.44            | 1.00            | 0.69                     | 0.723 | 1.12            | 1.01            | 0.91            | 0.957 |
| hsa-miR-191-5p  | 2.45             | 1.20                     | 0.49            | 0.061 | 1.41            | 1.44            | 1.02                     | 0.252 | 1.45            | 1.03            | 0.71            | 0.113 |
| hsa-miR-192-5p  | 0.43             | 0.90                     | 2.10            | 0.067 | 0.75            | 0.72            | 0.95                     | 0.193 | 0.63            | 0.70            | 1.11            | 0.301 |
| hsa-miR-193a-5p | 0.96             | 1.28                     | 1.34            | 0.634 | 0.59            | 0.78            | 1.32                     | 0.243 | 0.04            | 0.04            | 0.23            | 0.063 |
| hsa-miR-194-5p  | 54.56            | 57.58                    | 1.06            | 0.061 | 1.71            | 0.82            | 0.48                     | 0.099 | 0.73            | 1.05            | 1.44            | 0.561 |
| hsa-miR-195-5p  | 66.86            | 57.69                    | 0.86            | 0.061 | 1.00            | 0.55            | 0.55                     | 0.723 | 0.78            | 3.07            | 3.94            | 0.252 |



|                 |                                |                 |                  |       |                               |                 |                 |       |                 |                 |                 |       |
|-----------------|--------------------------------|-----------------|------------------|-------|-------------------------------|-----------------|-----------------|-------|-----------------|-----------------|-----------------|-------|
| hsa-miR-197-3p  | 1.28                           | 1.38            | 1.07             | 0.561 | 3.06<br>(0.051)               | 2.22<br>(0.303) | 0.73<br>(0.990) | 0.051 | 1.96            | 1.62            | 0.83            | 0.733 |
| hsa-miR-199a-3p | 1.83                           | 1.21            | 0.66             | 0.733 | 1.00                          | 61.46           | 61.46           | 0.063 | 2.06            | 0.70            | 0.34            | 0.177 |
| hsa-miR-199a-5p | 0.02                           | 0.02            | 1.00             | 0.063 | 0.87                          | 0.87            | 1.00            | 0.965 | 1.74            | 1.77            | 1.02            | 0.561 |
| hsa-miR-19a-3p  | <b>0.16</b><br><b>(0.022)</b>  | 0.39<br>(0.539) | 2.43<br>(0.539)  | 0.027 | 1.04                          | 2.37            | 2.27            | 0.393 | 0.95            | 4.36            | 4.59            | 0.061 |
| hsa-miR-19b-3p  | 0.12                           | 0.88            | 7.30             | 0.061 | 0.67                          | 1.17            | 1.74            | 0.733 | 0.60            | 1.16            | 1.93            | 0.43  |
| hsa-miR-200c-3p | 88.60                          | 38.04           | 0.43             | 0.094 | 0.78                          | 0.78            | 1.00            | 0.723 | 1.28            | 1.83            | 1.43            | 0.957 |
| hsa-miR-205-5p  | 1.00                           | 41.41           | 41.41            | 0.063 | 0.01                          | 1.10            | 99.72           | 0.105 | 0.83            | 0.80            | 0.96            | 0.832 |
| hsa-miR-20a-5p  | <b>0.30</b><br><b>(0.022)</b>  | 0.49<br>(0.539) | 1.65<br>(0.539)  | 0.027 | 0.30                          | 0.93            | 3.10            | 0.061 | 1.47            | 1.97            | 1.33            | 0.202 |
| hsa-miR-210-3p  | 1.38                           | 74.87           | 54.15            | 0.058 | 0.01                          | 0.01            | 1.00            | 0.063 | 0.05            | 0.05            | 1.00            | 0.063 |
| hsa-miR-2110    | 97.42                          | 95.16           | 0.98             | 0.067 | 0.01                          | 0.01            | 1.05            | 0.107 | 0.92            | 1.06            | 1.16            | 0.957 |
| hsa-miR-215-5p  | <b>0.005</b><br><b>(0.022)</b> | 0.38<br>(0.539) | 80.98<br>(0.539) | 0.027 | 0.00                          | 1.08            | 227.26          | 0.061 | 0.44            | 0.69            | 1.59            | 0.329 |
| hsa-miR-21-5p   | 0.93                           | 1.81            | 1.95             | 0.061 | 1.20                          | 0.38            | 0.32            | 0.061 | 0.67<br>(0.539) | 1.84<br>(0.539) | 2.73<br>(0.022) | 0.027 |
| hsa-miR-221-3p  | 0.44                           | 0.41            | 0.93             | 0.288 | 1.83                          | 2.06            | 1.13            | 0.061 | 2.47            | 1.41            | 0.57            | 0.252 |
| hsa-miR-222-3p  | 0.98                           | 1.37            | 1.39             | 0.837 | 2.31                          | 1.31            | 0.57            | 0.202 | 0.97            | 1.58            | 1.64            | 0.837 |
| hsa-miR-223-3p  | 1.65<br>(0.022)                | 2.44<br>(0.539) | 1.47<br>(0.539)  | 0.027 | <b>0.18</b><br><b>(0.022)</b> | 0.59<br>(0.539) | 3.25<br>(0.539) | 0.027 | 1.68            | 1.52            | 0.91            | 0.059 |
| hsa-miR-223-5p  | 1.00                           | 62.65           | 62.65            | 0.063 | 1.00                          | 1.00            | 1.00            | 1.000 | 1.10            | 0.03            | 0.03            | 0.067 |
| hsa-miR-22-3p   | 0.56                           | 0.68            | 1.21             | 0.561 | 1.39                          | 1.15            | 0.83            | 0.329 | 1.34            | 1.58            | 1.18            | 0.733 |
| hsa-miR-23a-3p  | 1.78                           | 1.95            | 1.09             | 0.067 | 1.06                          | 1.40            | 1.32            | 0.067 | 1.91<br>(0.022) | 1.56<br>(0.539) | 0.81<br>(0.539) | 0.027 |
| hsa-miR-23b-3p  | 2.05                           | 2.17            | 1.06             | 0.067 | 1.62                          | 0.68            | 0.42            | 0.148 | 1.17            | 1.60            | 1.36            | 0.099 |
| hsa-miR-24-3p   | 1.62                           | 0.97            | 0.60             | 0.061 | 1.15                          | 2.23            | 1.94            | 0.061 | 1.19<br>(0.990) | 1.54<br>(0.051) | 1.30<br>(0.303) | 0.051 |
| hsa-miR-25-3p   | 0.80                           | 0.86            | 1.08             | 0.148 | 0.84                          | 0.98            | 1.17            | 0.587 | 0.56<br>(0.034) | 0.91<br>(0.890) | 1.63<br>(0.408) | 0.039 |
| hsa-miR-26a-5p  | 1.16                           | 0.77            | 0.66             | 0.561 | 1.17<br>(0.990)               | 0.67<br>(0.303) | 0.58<br>(0.051) | 0.051 | 1.39            | 1.85            | 1.33            | 0.079 |

|                 |                                |                                |                  |       |                                 |                   |                 |       |                                |                 |                                 |       |
|-----------------|--------------------------------|--------------------------------|------------------|-------|---------------------------------|-------------------|-----------------|-------|--------------------------------|-----------------|---------------------------------|-------|
| hsa-miR-26b-5p  | 0.60                           | 0.29                           | 0.49             | 0.177 | 0.75                            | 0.01              | 0.01            | 0.058 | 1.05                           | 0.93            | 0.88                            | 0.733 |
| hsa-miR-27a-3p  | 0.86                           | 1.12                           | 1.31             | 0.393 | 0.02                            | 0.02              | 1.07            | 0.064 | 1.17                           | 1.71            | 1.46                            | 0.252 |
| hsa-miR-27b-3p  | 0.67                           | 0.74                           | 1.10             | 0.252 | 1.10                            | 1.12              | 1.02            | 0.957 | 1.69                           | 1.64            | 0.97                            | 0.193 |
| hsa-miR-28-3p   | 45.29                          | 36.91                          | 0.81             | 0.061 | 1.00                            | 0.73              | 0.73            | 0.723 | 0.92                           | 0.87            | 0.94                            | 0.733 |
| hsa-miR-28-5p   | 1.38                           | 0.82                           | 0.89             | 0.393 | 1.00                            | 1.00              | 1.00            | 1.000 | 1.12                           | 0.86            | 0.77                            | 0.561 |
| hsa-miR-29a-3p  | 0.42                           | 0.63                           | 1.50             | 0.113 | 2.09                            | 0.86              | 0.41            | 0.061 | 0.84                           | 0.99            | 1.18                            | 0.733 |
| hsa-miR-29b-3p  | 1.26<br>(0.699)                | <b>90.01</b><br><b>(0.027)</b> | 71.33<br>(0.470) | 0.032 | 1.13                            | 1.13              | 1.00            | 0.723 | 0.03                           | 0.03            | 1.00                            | 0.063 |
| hsa-miR-29c-3p  | 105.48                         | 155.82                         | 1.48             | 0.061 | 0.00                            | 0.00              | 1.00            | 0.063 | 0.02<br>(0.408)                | 2.10<br>(0.890) | <b>116.47</b><br><b>(0.034)</b> | 0.039 |
| hsa-miR-301a-3p | 0.41<br>(0.408)                | 0.26<br>(0.034)                | 0.63<br>(0.890)  | 0.039 | 0.98                            | 0.98              | 1.00            | 0.965 | 0.82                           | 1.83            | 2.24                            | 0.113 |
| hsa-miR-30a-5p  | 0.94                           | 43.97                          | 46.60            | 0.064 | <b>361.27</b><br><b>(0.022)</b> | 213.25<br>(0.539) | 0.59<br>(0.539) | 0.027 | 1.11                           | 1.46            | 1.31                            | 0.733 |
| hsa-miR-30b-5p  | 1.26                           | 1.14                           | 0.90             | 0.875 | 1.27                            | 1.48              | 1.17            | 0.587 | 1.32                           | 0.82            | 0.62                            | 0.148 |
| hsa-miR-30c-5p  | 1.24                           | 0.56                           | 0.45             | 0.099 | 1.33                            | 1.28              | 0.96            | 0.733 | 0.86                           | 0.56            | 0.65                            | 0.079 |
| hsa-miR-30d-5p  | 1.62                           | 1.22                           | 0.75             | 0.252 | 1.40                            | 1.41              | 1.01            | 0.301 | 1.72                           | 1.37            | 0.80                            | 0.113 |
| hsa-miR-30e-3p  | 94.44                          | 56.99                          | 0.60             | 0.061 | 0.01                            | 0.01              | 0.95            | 0.064 | 1.13                           | 2.61            | 2.31                            | 0.43  |
| hsa-miR-30e-5p  | 1.08                           | 1.09                           | 1.01             | 0.957 | 1.13                            | 1.29              | 1.14            | 0.67  | 1.52                           | 1.28            | 0.84                            | 0.957 |
| hsa-miR-320a    | 1.96<br>(0.022)                | 1.20<br>(0.539)                | 0.61<br>(0.539)  | 0.027 | 2.23<br>(0.303)                 | 2.46<br>(0.051)   | 1.10<br>(0.990) | 0.051 | 0.92                           | 0.76<br>(0.034) | 0.83                            | 0.039 |
| hsa-miR-320b    | 3.36<br>(0.034)                | 1.38                           | 0.41             | 0.039 | 1.08                            | 1.73              | 1.59            | 0.061 | 1.31                           | 0.93            | 0.71                            | 0.202 |
| hsa-miR-320c    | 2.03                           | 1.10                           | 0.54             | 0.067 | 1.45                            | 1.01              | 0.70            | 0.301 | 1.34                           | 1.11            | 0.83                            | 0.875 |
| hsa-miR-320d    | 1.35                           | 0.58                           | 0.43             | 0.061 | 2.35                            | 1.05              | 0.45            | 0.061 | 1.40                           | 1.43            | 1.02                            | 0.875 |
| hsa-miR-324-3p  | <b>82.55</b><br><b>(0.022)</b> | 45.45<br>(0.539)               | 0.55<br>(0.539)  | 0.027 | 1.02                            | 1.02              | 1.00            | 0.965 | 0.02                           | 0.02            | 1.00                            | 0.063 |
| hsa-miR-324-5p  | 1.00                           | 1.00                           | 1.00             | 0.999 | 1.02                            | 1.02              | 1.00            | 0.965 | 0.82                           | 0.77            | 0.94                            | 0.733 |
| hsa-miR-32-5p   | 0.84<br>(0.539)                | <b>0.02</b><br><b>(0.022)</b>  | 0.02<br>(0.539)  | 0.027 | 0.01                            | 0.01              | 1.10            | 0.064 | <b>25.95</b><br><b>(0.042)</b> | 6.99<br>(0.539) | 0.27<br>(0.539)                 | 0.047 |
| hsa-miR-326     | 52.65                          | 35.50                          | 0.67             | 0.105 | 0.01                            | 0.01              | 1.00            | 0.106 | 1.12                           | 0.87            | 0.78                            | 0.925 |
| hsa-miR-328-3p  | 1.31                           | 0.91                           | 0.69             | 0.957 | 1.06                            | 1.00              | 0.95            | 0.965 | 0.97                           | 0.99            | 1.02                            | 0.957 |

|                 |                                 |                  |                  |       |                   |                   |                  |       |                 |                 |                 |       |
|-----------------|---------------------------------|------------------|------------------|-------|-------------------|-------------------|------------------|-------|-----------------|-----------------|-----------------|-------|
| hsa-miR-331-3p  | 0.51<br>(0.539)                 | 0.28<br>(0.022)  | 0.54<br>(0.539)  | 0.027 | 0.01              | 0.01              | 1.00             | 0.063 | 68.65           | 63.38           | 0.92            | 0.067 |
| hsa-miR-335-3p  | <b>109.94</b><br><b>(0.022)</b> | 40.61<br>(0.539) | 0.37<br>(0.539)  | 0.027 | 0.86              | 0.86              | 1.00             | 0.723 | 0.70            | 1.10            | 1.56            | 0.329 |
| hsa-miR-338-3p  | 0.01                            | 0.26             | 21.32            | 0.092 | 1.00              | 1.00              | 1.00             | 1.000 | 4.85            | 2.94            | 0.61            | 0.172 |
| hsa-miR-339-3p  | 1.22                            | 1.13             | 0.92             | 0.243 | 1.00              | 1.00              | 1.00             | 1.000 | 0.81            | 0.85            | 1.06            | 0.733 |
| hsa-miR-339-5p  | 0.83                            | 0.46             | 0.55             | 0.099 | 1.00              | 1.20              | 1.20             | 0.723 | 1.44            | 0.86            | 0.60            | 0.875 |
| hsa-miR-342-3p  | 0.47                            | 0.53             | 1.11             | 0.113 | 0.78              | 1.06              | 1.36             | 0.099 | 0.89            | 0.63            | 0.70            | 0.113 |
| hsa-miR-34a-5p  | 0.01                            | 0.01             | 1.00             | 0.106 | 0.02              | 0.02              | 0.02             | 0.106 | 0.46            | 2.51            | 5.48            | 0.088 |
| hsa-miR-361-5p  | 41.21                           | 40.19            | 0.98             | 0.067 | 0.018<br>(0.051)  | 0.71<br>(0.990)   | 38.93<br>(0.303) | 0.051 | 1.49            | 1.34            | 0.90            | 0.202 |
| hsa-miR-363-3p  | 0.63                            | 1.48             | 2.36             | 0.252 | 426.24<br>(0.051) | 293.57<br>(0.303) | 0.69<br>(0.990)  | 0.051 | 0.97            | 2.06            | 2.12            | 0.301 |
| hsa-miR-374a-5p | 62.74                           | 58.00            | 0.92             | 0.067 | 1.16              | 1.16              | 1.00             | 0.723 | 0.99            | 1.75            | 1.76            | 0.43  |
| hsa-miR-374b-5p | 0.76                            | 1.08             | 1.42             | 0.067 | 1.08              | 1.08              | 1.00             | 0.965 | 1.29            | 0.85            | 0.66            | 0.288 |
| hsa-miR-375     | 0.87                            | 0.25             | 0.29             | 0.061 | 0.95              | 537.81            | 567.13           | 0.064 | 0.85<br>(0.990) | 0.12<br>(0.051) | 0.14<br>(0.303) | 0.051 |
| hsa-miR-376a-3p | <b>119.83</b><br><b>(0.022)</b> | 60.29<br>(0.539) | 0.50<br>(0.539)  | 0.027 | 1.10              | 1.06              | 0.96             | 0.243 | 1.45            | 1.12            | 0.77            | 0.733 |
| hsa-miR-376c-3p | 48.18                           | 37.90            | 0.79             | 0.067 | 1.00              | 1.00              | 1.00             | 1.000 | 1.20            | 1.31            | 1.09            | 0.587 |
| hsa-miR-378a-3p | 0.43                            | 0.53             | 1.24             | 0.118 | 1.03              | 0.59              | 0.58             | 0.249 | 1.16            | 2.13            | 1.84            | 0.113 |
| hsa-miR-382-5p  | <b>48.84</b><br><b>(0.034)</b>  | 34.56<br>(0.408) | 0.71<br>(0.890)  | 0.039 | 1.00              | 1.00              | 1.00             | 1.000 | 1.30            | 1.19            | 0.91            | 0.733 |
| hsa-miR-409-3p  | 167.47                          | 54.75            | 0.33             | 0.061 | 0.93              | 0.93              | 1.00             | 0.723 | 1.08            | 1.15            | 1.07            | 0.957 |
| hsa-miR-421     | 77.44                           | 59.37            | 0.77             | 0.061 | 1.00              | 1.00              | 1.00             | 1.000 | 1.18            | 1.20            | 1.01            | 0.875 |
| hsa-miR-423-3p  | 255.60                          | 312.52           | 1.22             | 0.067 | 1.00              | 1.23              | 1.23             | 0.723 | 1.17            | 1.19            | 1.01            | 0.733 |
| hsa-miR-423-5p  | 1.79                            | 1.71             | 0.95             | 0.393 | 1.63              | 1.52              | 0.93             | 0.43  | 1.26            | 0.80            | 0.63            | 0.43  |
| hsa-miR-424-5p  | <b>0.01</b><br><b>(0.022)</b>   | 0.42<br>(0.539)  | 53.00<br>(0.539) | 0.027 | 291.39            | 1.00              | 0.00             | 0.063 | 26.76           | 1.00            | 0.04            | 0.063 |
| hsa-miR-425-3p  | <b>70.16</b><br><b>(0.022)</b>  | 36.94<br>(0.539) | 0.53<br>(0.539)  | 0.027 | 0.93              | 0.93              | 1.00             | 0.723 | 1.46            | 0.95            | 0.65            | 0.193 |
| hsa-miR-425-5p  | 157.54                          | 102.89           | 0.65             | 0.061 | 0.01              | 0.71              | 132.01           | 0.061 | 1.05            | 1.00            | 0.94            | 0.957 |

|                |                                 |                  |                  |       |                 |                               |                                |       |                 |                 |                 |       |
|----------------|---------------------------------|------------------|------------------|-------|-----------------|-------------------------------|--------------------------------|-------|-----------------|-----------------|-----------------|-------|
| hsa-miR-451a   | 0.18<br>(0.051)                 | 0.57<br>(0.990)  | 3.19<br>(0.303)  | 0.051 | 0.53            | 0.55                          | 1.04                           | 0.067 | 0.38            | 0.70            | 1.83            | 0.202 |
| hsa-miR-454-3p | <b>85.10</b><br><b>(0.034)</b>  | 48.15<br>(0.408) | 0.57<br>(0.890)  | 0.039 | 0.91            | 0.91                          | 1.00                           | 0.723 | 0.85            | 0.61            | 0.72            | 0.252 |
| hsa-miR-483-5p | 120.24                          | 51.37            | 0.43             | 0.061 | 0.99            | 0.00                          | 0.00                           | 0.061 | 0.82            | 1.26            | 1.53            | 0.561 |
| hsa-miR-484    | 0.67                            | 0.61             | 0.91             | 0.193 | 1.61<br>(0.034) | 1.20                          | 0.74                           | 0.039 | 1.46            | 1.30            | 0.89            | 0.733 |
| hsa-miR-485-3p | <b>102.79</b><br><b>(0.034)</b> | 52.17<br>(0.408) | 0.51<br>(0.890)  | 0.039 | 1.00            | 1.00                          | 1.00                           | 1.000 | 0.88            | 0.01            | 0.02            | 0.061 |
| hsa-miR-486-5p | 2.55                            | 1.73             | 0.68<br>(0.051)  | 0.051 | 1.07            | 1.51                          | 1.41                           | 0.061 | 0.34<br>(0.022) | 0.88<br>(0.539) | 2.56<br>(0.539) | 0.027 |
| hsa-miR-495-3p | 29.29                           | 17.06            | 0.58             | 0.292 | 0.04            | 0.04                          | 1.00                           | 0.106 | 0.89            | 2.95            | 3.30            | 0.55  |
| hsa-miR-501-3p | 94.77                           | 65.85            | 0.69             | 0.061 | 0.78            | 0.78                          | 1.00                           | 0.723 | 0.93            | 20.77           | 22.43           | 0.063 |
| hsa-miR-502-3p | 40.99                           | 1.31             | 0.03             | 0.058 | 1.00            | 1.00                          | 1.00                           | 1.000 | 1.00            | 15.02           | 15.02           | 0.063 |
| hsa-miR-505-3p | 173.71                          | 95.00            | 0.55             | 0.061 | 0.89            | 0.89                          | 1.00                           | 0.965 | 0.94            | 0.03            | 0.03            | 0.067 |
| hsa-miR-532-3p | 0.85<br>(0.022)                 | 66.76<br>(0.539) | 78.56<br>(0.539) | 0.058 | 0.76            | 0.92                          | 1.21                           | 0.243 | 1.56            | 0.03            | 0.02            | 0.061 |
| hsa-miR-532-5p | 0.02                            | 0.52             | 29.04            | 0.027 | 0.01<br>(0.303) | 1.10<br>(0.990)               | 109.65<br>(0.051)              | 0.051 | 0.56            | 1.20            | 2.14            | 0.301 |
| hsa-miR-543    | 31.81                           | 19.19            |                  | 0.105 | 1.00            | 1.00                          | 1.00                           | 1.000 | 5.90            | 1.68            | 0.29            | 0.063 |
| hsa-miR-574-3p | 0.30<br>(0.034)                 | 0.54<br>(0.408)  | 1.81<br>(0.890)  | 0.039 | 0.02<br>(0.470) | <b>0.01</b><br><b>(0.027)</b> | 0.80<br>(0.699)                | 0.032 | 0.84            | 0.78            | 0.93            | 0.67  |
| hsa-miR-584-5p | 75.16                           | 43.66            | 0.58             | 0.061 | 0.91            | 0.91                          | 1.00                           | 0.723 | 1.46            | 1.27            | 0.87            | 0.252 |
| hsa-miR-590-5p | 0.41<br>(0.051)                 | 0.75<br>(0.990)  | 1.83<br>(0.303)  | 0.051 | 1.27            | 1.05                          | 0.83                           | 0.193 | 1.06            | 1.60            | 1.50            | 0.43  |
| hsa-miR-629-5p | 0.81                            | 0.89             | 1.09             | 0.561 | 2.91<br>(0.470) | 0.01<br>(0.699)               | <b>0.004</b><br><b>(0.027)</b> | 0.032 | 0.91            | 1.98            | 2.18            | 0.707 |
| hsa-miR-652-3p | 1.55                            | 0.62             | 0.40             | 0.177 | 1.18            | 1.33                          | 1.13                           | 0.179 | 1.01            | 0.71            | 0.70            | 0.43  |
| hsa-miR-660-5p | 47.80                           | 55.51            | 1.16             | 0.067 | 164.86          | 0.92                          | 0.01                           | 0.055 | 1.00            | 30.22           | 30.22           | 0.063 |
| hsa-miR-7-5p   | 1.00                            | 41.95            |                  | 0.063 | 0.02            | 0.02                          | 1.00                           | 0.106 | 0.48            | 0.47            | 0.99            | 0.55  |
| hsa-miR-766-3p | 1.24                            | 0.67             | 0.54             | 0.202 | 1.00            | 1.00                          | 1.00                           | 0.965 | 1.87            | 4.33            | 2.31            | 0.061 |
| hsa-miR-874-3p | 51.27                           | 1.32             | 0.03             | 0.058 | 0.76            | 0.76                          | 1.00                           | 0.723 | 0.06            | 0.08            | 1.32            | 0.058 |

|                       |                                |                  |                 |       |                 |                 |                                 |       |       |       |       |       |
|-----------------------|--------------------------------|------------------|-----------------|-------|-----------------|-----------------|---------------------------------|-------|-------|-------|-------|-------|
| <b>hsa-miR-877-5p</b> | 0.72                           | 86.06            | 119.53          | 0.055 | 0.01            | 0.01            | 1.34                            | 0.063 | 0.64  | 1.29  | 2.01  | 0.43  |
| <b>hsa-miR-885-5p</b> | 1.00                           | 45.46            | 45.46           | 0.063 | 0.01            | 0.01            | 1.00                            | 0.063 | 0.86  | 3.72  | 4.34  | 0.707 |
| <b>hsa-miR-92a-3p</b> | 1.83<br>(0.539)                | 1.94<br>(0.022)  | 1.06<br>(0.539) | 0.027 | 2.25<br>(0.022) | 1.74<br>(0.539) | 0.77<br>(0.539)                 | 0.027 | 1.11  | 0.91  | 0.82  | 0.288 |
| <b>hsa-miR-92b-3p</b> | 105.57                         | 1.00             | 0.01            | 0.063 | 0.77            | 0.77            | 1.00                            | 0.723 | 0.04  | 1.22  | 30.53 | 0.067 |
| <b>hsa-miR-93-3p</b>  | 70.27                          | 77.79            | 1.11            | 0.061 | 0.01<br>(0.539) | 1.54<br>(0.539) | <b>156.47</b><br><b>(0.022)</b> | 0.027 | 0.46  | 0.76  | 1.64  | 0.561 |
| <b>hsa-miR-93-5p</b>  | 0.57                           | 0.59             | 1.03            | 0.061 | 0.85            | 1.43            | 1.69                            | 0.202 | 0.72  | 1.71  | 2.37  | 0.099 |
| <b>hsa-miR-99a-5p</b> | <b>93.07</b><br><b>(0.034)</b> | 48.88<br>(0.408) | 0.53<br>(0.890) | 0.039 | 0.87            | 1.00            | 1.15                            | 0.723 | 38.95 | 33.56 | 0.86  | 0.061 |
| <b>hsa-miR-99b-5p</b> | 1.88                           | 0.80             | 0.42            | 0.113 | 1.06            | 1.06            | 1.00                            | 0.106 | 1.44  | 0.88  | 0.61  | 0.587 |

Expressions for each miRNAs from K2EDTA, PPP and PPT samples and each storage condition were compared through Kruskal-Wallis test. P < 0.05 was considered statistically significant. Dunn's multiple comparison test was performed for the comparison between two conditions, only for significant Kruskal-Wallis test. Differences in miRNA expression between two conditions is reported as the ratio of miRNA expression of an "experimental" condition and a "reference" condition (fold change). In bold are reported  $\geq \pm 5$ -fold change values which are statistically significant. RT – room temperature. K2EDTA - dipotassium ethylenediaminetetraacetate tubes. PPT – plasma preparation tubes. PPP- platelet-poor plasma.
